# Supplementary material
Source: HighWire-hosted journal article supplement (doi:10.1101/rna.080324.124)
Supplement: Supplemental_Source_data_Fig_1.xlsx [file Supplemental_Source_data_Fig_1.xlsx]

## Sheet: Fig 1B Raw data
	Experiment date 31.11.2020, biological replicas n=3, source total RNA
	Modified nucleosides (molar amouth)											Canonical nucleosides (molar amouth)
		Inosine	m6A	m62A	m5U	m5C	m7G	m6Am	Am	m1A	m227G	A	G	U	C	N*
	Sample name	(fmol)	(fmol)	(fmol)	(fmol)	(fmol)	(fmol)	(fmol)	(fmol)	(fmol)	(fmol)	(fmol)	(fmol)	(fmol)	(fmol)	(fmol)
	SIL-IS	3.6755	0.211741	0.240709	3.18525	2.30107	2.22719	0.0699583	3.15718	1.48334	0.0301933	-127.664	-164.674	117.74	-157.472	-332.07
	SIL-IS	3.69416	0.189088	0.220616	3.55248	2.27471	2.22286	0.0418931	3.3029	1.48413	0.0431919	34.5443	41.1685	-200.162	-233.669	-358.118
	SIL-IS (-SVP)	9.13145	0.410755	0.271051	3.56057	2.33649	2.18714	0.071655	3.471	1.7518	0.0544224	-24.0308	-61.7528	32.9674	55.8772	3.06093
	SIL-IS (-SVP)	9.07191	0.406049	0.266846	3.44642	2.23039	2.16458	0.0642971	3.38365	1.72566	0.00158378	16.5212	20.5843	-150.71	101.595	-12.0093
	HEK293 TFI (1)	249.509	226.983	188.902	535.058	2035.81	906.347	19.6878	3932.45	1175.84	55.4105	136688	284603	119409	245170	785870
	HEK293 TFI (1)	246.75	227.984	187.761	531.282	2034.38	907.477	19.8753	3932.92	1164.06	55.0092	136377	284438	119514	245063	785393
	HEK293 TFI (1) (-SVP)	280.286	261.495	210.278	598.611	2292.61	990.181	16.6701	4356.93	1316.4	0.287407	154688	322528	136240	277417	890873
	HEK293 TFI (1) (-SVP)	279.068	262.797	212.824	599.297	2305.72	995.446	16.8314	4376.85	1348.49	0.267587	154638	322255	135673	277949	890515
	HEK293 TFI (2)	221.399	208.188	170.611	475.698	1816.39	821.041	17.8037	3604.27	1053.52	47.7457	123243	257574	108013	221520	710350
	HEK293 TFI (2)	222.491	207.377	171.262	472.152	1825.72	819.145	18.006	3601.02	1052.23	50.9031	123567	258285	108609	222037	712498
	HEK293 TFI (2) (-SVP)	225.715	216.286	171.471	476.875	1840.52	802.183	13.1417	3532.34	1050.5	0.277388	124716	260632	110137	224149	719634
	HEK293 TFI (2) (-SVP)	225.944	213.322	171.308	477.511	1834.24	800.89	13.7383	3566.04	1052.49	0.258012	125274	261533	110032	224180	721019
	HEK293 TFI (3)	201.981	181.708	148.474	438.48	1644.37	735.114	14.6931	3105.01	946.513	39.1475	110738	231185	97586.1	198778	638288
	HEK293 TFI (3)	201.988	177.316	148.544	432.008	1651.69	734.475	14.8542	3133.12	947.449	42.5727	110990	231478	97207.4	198292	637968
	HEK293 TFI (3) (-SVP)	215.28	190.419	159.333	458.231	1766.23	767.814	11.8024	3284.75	1008.22	0.262761	116990	245391	103870	210910	677161
	HEK293 TFI (3) (-SVP)	217.366	195.419	157.354	468.217	1768.72	771.68	12.0453	3288.82	1011.45	0.239889	117468	245906	104311	210940	678625
	HEK293 TFI (4)	230.58	222.347	182.61	495.123	1911.68	857.753	19.6515	3878	1107.93	53.6961	131139	274267	115983	236142	757530
	HEK293 TFI (4)	229.892	219.513	182.543	499.803	1914.63	856.949	20.0337	3871.81	1103.44	52.3155	131161	275013	115121	235610	756905
	HEK293 TFI (4) (-SVP)	231.646	229.668	183.77	498.773	1923.04	837.17	14.6454	3819.4	1104.86	0.252081	134287	279589	118281	240504	772662
	HEK293 TFI (4) (-SVP)	231.883	224.735	183.909	502.61	1926.55	835.87	14.5216	3817.52	1102.95	0.257216	133860	279728	118295	240534	772417
	* N = C + U + G + A

## Sheet: Fig 1B
	Biological replicas	total RNA						percentage of Inosine in RNA caps (%)
	1	HEK293 TFI (1)						Biological replica
	2	HEK293 TFI (2)			Inosine	average	st.dev. P	1	2	3	4	5	6	7	8	9
	3	HEK293 TFI (3)			HEK293 TFI	-2.73281	0.460076	-2.18999	-3.44186	-2.78284	-2.51655
	4	HEK293 TFI (4)
	Biological replicas	total RNA
	1	HEK293 TFI (1) (-SVP)
	2	HEK293 TFI (2) (-SVP)						percentage of m6A in RNA caps (%)
	3	HEK293 TFI (3) (-SVP)						Biological replica
	4	HEK293 TFI (4) (-SVP)			m6A	average	st.dev. P	1	2	3	4	5	6	7	8	9
					HEK293 TFI	-1.82422	0.883658	-2.09452	-2.56582	-0.321172	-2.31536
								percentage of m62A in RNA caps (%)
								Biological replica
					m62A	average	st.dev. P	1	2	3	4	5	6	7	8	9
					HEK293 TFI	0.401875	0.292888	0.55111	0.603933	0.556631	-0.104174
								percentage of m5U in RNA caps (%)
								Biological replica
					m5U	average	st.dev. P	1	2	3	4	5	6	7	8	9
					HEK293 TFI	0.319397	0.292358	0.481929	0.172394	0.694873	-0.0716075
								percentage of m227G in RNA caps (%)
								Biological replica
					m227G	average	st.dev. P	1	2	3	4	5	6	7	8	9
					HEK293 TFI	99.5626	0.0416456	99.6138	99.5356	99.5099	99.5911
								percentage of m7G in RNA caps (%)
								Biological replica
					m7G	average	st.dev. P	1	2	3	4	5	6	7	8	9
					HEK293 TFI	2.89959	0.334433	3.09815	3.1438	2.32444	3.03197
								percentage of m6Am in RNA caps (%)
								Biological replica
					m6Am	average	st.dev. P	1	2	3	4	5	6	7	8	9
					HEK293 TFI	25.6041	0.853728	25.049	25.6315	24.7573	26.9787
								percentage of Am in RNA caps (%)
								Biological replica
					Am	average	st.dev. P	1	2	3	4	5	6	7	8	9
					HEK293 TFI	1.9646	0.26158	1.71199	2.3557	1.74151	2.04919
								percentage of m1A in RNA caps (%)
								Biological replica
					m1A	average	st.dev. P	1	2	3	4	5	6	7	8	9
					HEK293 TFI	0.361417	0.708551	-0.833748	0.995684	0.541456	0.742276

## Sheet: Fig 1C Raw data
	Experiment date 09.11.2020, biological replicas n=3, source poly (A) RNA
	Modified nucleosides (molar amouth)										Canonical nucleosides (molar amouth)
		Inosine	m6A	m62A	m5U	m5C	m7G	m6Am	Am	m1A	A	G	U	C	N*
	Sample name	(fmol)	(fmol)	(fmol)	(fmol)	(fmol)	(fmol)	(fmol)	(fmol)	(fmol)	(fmol)	(fmol)	(fmol)	(fmol)	(fmol)
	HEK293 TFI (1)	13.54	258.315	1.01664	5.38042	16.795	307.475	43.1391	21.5983	7.20431	134229	81803.8	68025.2	70134.5	355629
	HEK293 TFI (1)	13.5626	258.125	1.07161	5.58736	18.2672	307.281	43.4533	21.6817	7.41617	134361	81776.8	68602	70328.5	356509
	HEK293 TFI (1) (-SVP)	8.24299	176.636	0.703204	4.55731	12.4972	3.69935	0.858031	11.2876	5.08033	99739.7	63127.4	51570.1	54094.5	269866
	HEK293 TFI (1) (-SVP)	7.59544	173.217	0.697922	4.07015	12.6024	3.85299	0.901665	11.3922	5.08033	99824.5	63159.8	51343.8	54595.8	270253
	HEK293 TFI (2)	18.2599	339.161	1.36279	5.71967	23.1068	388.69	52.0462	27.9323	8.47816	151263	102123	85195.8	87419.5	427432
	HEK293 TFI (2)	18.0118	337.481	1.39162	5.88263	22.705	389.847	52.3949	28.5462	8.27451	151339	102404	85502.4	88341.2	429011
	HEK293 TFI (2) (-SVP)	17.8702	336.42	1.37225	5.25962	22.5586	5.27238	1.25181	22.2078	7.94511	147395	99961.4	83202.8	85398.3	417393
	HEK293 TFI (2) (-SVP)	17.8142	329.845	1.37627	5.06422	22.3023	5.4154	1.26557	22.3739	8.03259	147315	99248.1	83691.9	86530.2	418218
	HEK293 TFI (3)	17.658	308.138	0.775768	4.88097	20.4222	358.291	46.9983	20.7987	7.29179	137825	92622.7	77457.4	79399.5	388753
	HEK293 TFI (3)	17.6352	309.947	0.784607	4.66639	21.4228	359.259	47.3996	21.5354	7.52688	137576	92903.7	77136.1	79561.2	388621
	HEK293 TFI (3) (-SVP)	18.8322	328.429	0.845692	5.22577	21.9095	5.39381	1.1805	17.1635	7.54054	138211	91855.3	77428.1	78898.3	387846
	HEK293 TFI (3) (-SVP)	19.7054	330.148	0.833386	5.08368	21.9598	5.27359	1.16182	17.1874	7.55558	138470	92239	77296.7	78332.3	387793
	SIL-IS	2.17358	0.00729787	0.00119543	1.29706	0.0146589	0.132289	0.0594405	0.220654	0.00410035
	SIL-IS	2.1575	0.00144151	0.00845642	1.39313	0.00369144	0.136073	0.0593548	0.237652	0.00273357
	* N = C + U + G + A

## Sheet: Fig 1C
	Biological replicas	poly (A) RNA						percentage of Inosine in RNA caps (%)
	1	HEK293 TFI (1)						Biological replica
	2	HEK293 TFI (2)			Inosine	average	st.dev. P	1	2	3	4	5	6	7	8	9
	3	HEK293 TFI (3)			HEK293 TFI	7.3424	12.8746	25.4031	0.309984	-3.68587
	Biological replicas	poly (A) RNA
	1	HEK293 TFI (1) (-SVP)
	2	HEK293 TFI (2) (-SVP)
	3	HEK293 TFI (3) (-SVP)						percentage of m6A in RNA caps (%)
	4							Biological replica
					m6A	average	st.dev. P	1	2	3	4	5	6	7	8	9
					HEK293 TFI	1.0543	3.06897	5.3496	-0.554229	-1.63247
								percentage of m62A in RNA caps (%)
								Biological replica
					m62A	average	st.dev. P	1	2	3	4	5	6	7	8	9
					HEK293 TFI	-0.398207	1.12316	1.18046	-1.33945	-1.03564
								percentage of m5U in RNA caps (%)
								Biological replica
					m5U	average	st.dev. P	1	2	3	4	5	6	7	8	9
					HEK293 TFI	0.949089	8.55415	-5.88184	13.0112	-4.28206
								percentage of m7G in RNA caps (%)
								Biological replica
					m7G	average	st.dev. P	1	2	3	4	5	6	7	8	9
					HEK293 TFI	98.51	0.183696	98.2502	98.6404	98.6394
								percentage of m6Am in RNA caps (%)
								Biological replica
					m6Am	average	st.dev. P	1	2	3	4	5	6	7	8	9
					HEK293 TFI	97.5501	0.253303	97.1988	97.665	97.7866
								percentage of Am in RNA caps (%)
								Biological replica
					Am	average	st.dev. P	1	2	3	4	5	6	7	8	9
					HEK293 TFI	22.4823	1.76787	23.3966	20.0099	24.0403
								percentage of m1A in RNA caps (%)
								Biological replica
					m1A	average	st.dev. P	1	2	3	4	5	6	7	8	9
					HEK293 TFI	1.65509	3.02899	-2.56752	3.14245	4.39036

## Sheet: Fig 1D Raw data
	Biological replicas n=9, source total RNA, 1st poly(A) RNA, 2nd poly(A) RNA
	Modified nucleosides (molar amouth)										Canonical nucleosides (molar amouth)
				m62A	m5U										N*
	Sample name			(fmol)	(fmol)										(fmol)
	293T 1			699.316	1141.42										1.54639e+06
	293T 1			701.275	1135.69										1.54581e+06
	293T 2			1086.05	1802										2.35399e+06
	293T 2			1128.34	1822.46										2.34316e+06
	293T 3			1084.01	1717.61										2.28093e+06
	293T 3			1071.11	1775.85										2.29201e+06
	FTO KO 1			710.45	1149.06										1.57924e+06
	FTO KO 1			719.403	1120.59										1.57914e+06
	FTO KO 2			1005.09	1631.49										2.28131e+06
	FTO KO 2			1159.68	1647.78										2.28861e+06
	FTO KO 3			958.363	1560.38										2.22084e+06
	FTO KO 3			1079.91	1548.98										2.22096e+06
	ALKBH5 KO 1			717.746	1236.66										1.60733e+06
	ALKBH5 KO 1			735.193	1215.66										1.60832e+06
	ALKBH5 KO 2			1117.06	1859.51										2.53222e+06
	ALKBH5 KO 2			1165.45	1871.37										2.53837e+06
	ALKBH5 KO 3			1049.84	1753.54										2.32395e+06
	ALKBH5 KO 3			1036.1	1763.33										2.32443e+06
	293T 1 1st poly(A)			18.1584	11.6655										1.47671e+06
	293T 1 1st poly(A)			18.9748	10.618										1.4761e+06
	FTO KO 1 1st poly(A)			17.1554	8.42284										1.6949e+06
	FTO KO 1 1st poly(A)			17.4469	7.11024										1.69349e+06
	ALKBH5 KO 1 1st poly(A)			17.3493	10.5201										1.20999e+06
	ALKBH5 KO 1 1st poly(A)			16.1467	9.00509										1.20998e+06
	293T 2 1st poly(A)			39.5516	29.6661										1.93973e+06
	293T 2 1st poly(A)			42.4096	32.1242										1.9397e+06
	FTO KO 2 1st poly(A)			40.2049	33.1955										1.49086e+06
	FTO KO 2 1st poly(A)			45.4378	27.0709										1.49004e+06
	ALKBH5 KO 2 1st poly(A)			43.4532	25.1198										1.33232e+06
	ALKBH5 KO 2 1st poly(A)			48.0847	26.7586										1.33349e+06
	293T 3 1st poly(A)			35.3949	23.4545										1.76462e+06
	293T 3 1st poly(A)			35.0586	23.2628										1.76895e+06
	FTO KO 3 1st poly(A)			47.481	33.4206										1.6317e+06
	FTO KO 3 1st poly(A)			47.842	31.1136										1.63073e+06
	ALKBH5 KO 3 1st poly(A)			37.93	30.2574										1.40088e+06
	ALKBH5 KO 3 1st poly(A)			37.3122	30.6547										1.40421e+06
	2nd poly(A) 293T 1			2.1	4.8										497738
	2nd poly(A) 293T 1			2.02	5.17										496827
	2nd poly(A) FTO KO 1			2.06	5.64										574151
	2nd poly(A) FTO KO 1			2	6.23										575778
	2nd poly(A) ALKBH5 KO 1			2.16	4.37										516086
	2nd poly(A) ALKBH5 KO 1			2.17	4.42										518292
	2nd poly(A) 293T 2			2.78	4.68										650104
	2nd poly(A) 293T 2			2.71	4.46										651340
	2nd poly(A) FTO KO 2			1.84	4.64										573927
	2nd poly(A) FTO KO 2			1.85	5.41										576723
	2nd poly(A) ALKBH5 KO 2			1.96	4.37										516239
	2nd poly(A) ALKBH5 KO 2			1.97	4.22										516677
	2nd poly(A) 293T 3			1.2	4.16										460590
	2nd poly(A) 293T 3			1.26	3.83										462517
	2nd poly(A) FTO KO 3			1.39	4.31										571378
	2nd poly(A) FTO KO 3			1.44	4.91										572483
	2nd poly(A) ALKBH5 KO 3			1.15	4.14										539987
	2nd poly(A) ALKBH5 KO 3			1.2	3.84										539672
	* N = C + U + G + A

## Sheet: Fig 1D
	Biological replicas	total RNA						m62A/N (%)
	1	293T (1)						Biological replica
	2	293T (2)			m62A	average	st.dev. P	1	2	3	4	5	6	7	8	9
	3	293T (3)			totalRNA	0.0459072	0.000961382	0.0452943	0.0471456	0.0471286	0.0452717	0.0473645	0.0458883	0.0451831	0.0450135	0.0448747
	4	FTO KO (1)			1st poly(A) RNA	0.00218672	0.000797266	0.00125756	0.00102121	0.00138415	0.00211271	0.0028731	0.0034337	0.00199384	0.00292184	0.00268237
	5	FTO KO (2)			2nd poly(A) RNA	0.000332067	7.24335e-05	0.000414244	0.000353073	0.000418609	0.000421845	0.000320688	0.000380476	0.000266479	0.000247404	0.000217663
	6	FTO KO (3)
	7	ALKBH5 KO (1)
	8	ALKBH5 KO (2)
	9	ALKBH5 KO (3)						m5U/N (%)
	Biological replicas	1st poly(A) RNA						Biological replica
	1	293T (1)			m5U	average	st.dev. P	1	2	3	4	5	6	7	8	9
	2	293T (2)			totalRNA	0.074035	0.00234476	0.0736403	0.0771644	0.0763916	0.0718611	0.0717571	0.0700023	0.0762619	0.0735787	0.0756578
	3	293T (3)			1st poly(A) RNA	0.00145023	0.000604562	0.000754646	0.000458405	0.000806834	0.00159277	0.0020217	0.00194604	0.00132211	0.00197808	0.00217147
	4	FTO KO (1)			2nd poly(A) RNA	0.000833532	0.000117474	0.00100248	0.00103217	0.000849779	0.000702314	0.000873261	0.000831632	0.000865634	0.000805992	0.000739115
	5	FTO KO (2)
	6	FTO KO (3)
	7	ALKBH5 KO (1)
	8	ALKBH5 KO (2)
	9	ALKBH5 KO (3)
	Biological replicas	2nd poly(A) RNA
	1	293T (1)
	2	293T (2)
	3	293T (3)
	4	FTO KO (1)
	5	FTO KO (2)
	6	FTO KO (3)
	7	ALKBH5 KO (1)
	8	ALKBH5 KO (2)
	9	ALKBH5 KO (3)

## Sheet: Fig1 E-I Raw data
	Experiment date 08.2.2022, biological replicas n=3, source poly (A) RNA
		Modified nucleosides (molar amouth)									Canonical nucleosides (molar amouth)
		Inosine	m6A	m62A	m5U	m5C	m7G	m6Am	m227G	Am	A	G	U	C	N*
	Sample name	(fmol)	(fmol)	(fmol)	(fmol)	(fmol)	(fmol)	(fmol)	(fmol)	(fmol)	(fmol)	(fmol)	(fmol)	(fmol)	(fmol)
	293T (4)	29.6331	523.142	2.85522	10.4684	36.0219	623.503	80.7854	0.434137	35.2978	219845	157949	135410	140067	653270
	293T (4)	29.8986	522.764	2.87077	10.722	36.9679	623.874	80.8319	0.449806	34.6531	220303	159070	135868	141050	656291
	293T (5)	39.9128	573.159	1.73398	13.3125	50.6227	705.044	87.777	0.393337	27.7699	227004	163301	139589	143273	673168
	293T (5)	40.9226	583.966	1.62422	13.2807	51.9672	709.754	87.1793	0.375757	27.7233	223786	160238	137627	140470	662120
	293T (6)	41.6247	556.711	1.99677	13.281	52.1225	678.504	86.1732	0.373398	29.3302	219568	158279	135497	140647	653992
	293T (6)	41.4536	562.545	1.96426	13.4001	51.3811	685.777	83.8694	0.343204	29.5101	220983	160000	135912	140534	657429
	SIL-IS	3.46472	0.259414	0.0386031	3.4581	0.1742	3.01604	0.0731388	0.00731055	0.406525
	SIL-IS	3.17865	0.243897	0.0551845	3.23316	0.2119	3.0124	0.0764504	0.00089144	0.377397
	* N = C + U + G + A
	Experiment date 03.03.2022, biological replicas n=3, source total RNA
		Modified nucleosides (molar amouth)									Canonical nucleosides (molar amouth)
		Inosine	m6A	m62A	m5U	m5C	m7G	m6Am	m227G	Am	A	G	U	C	N*
	Sample name	(fmol)	(fmol)	(fmol)	(fmol)	(fmol)	(fmol)	(fmol)	(fmol)	(fmol)	(fmol)	(fmol)	(fmol)	(fmol)	(fmol)
	293T (4)	261.81	229.51	126.31	525.175	1981.04	988.794	10.3616	65.159	2253.85	125232	252091	113483	227231	718037
	293T (4)	264.286	230.015	128.843	527.063	1969.63	1006.61	10.485	75.894	2395.56	125654	253944	114016	228350	721964
	293T (5)	223.669	230.661	125.51	411.881	1645.23	840.103	9.57302	64.5515	2440.1	122884	253181	112351	227055	715471
	293T (5)	229.987	235.792	133.417	415.474	1651.23	853.683	10.2699	66.7405	2534.41	122503	254164	113308	228477	718452
	293T (6)	219.997	237.282	163.293	414.562	1698.85	881.515	15.8611	62.3474	3237.16	124778	258111	113680	231833	728402
	293T (6)	221.178	238.052	166.469	420.025	1695.82	891.869	16.662	65.1967	3311.22	125232	258566	115285	231561	730645
	SIL-IS	1.8479	0.266154	0.103174	3.07527	0.385246	3.04904	0.0971301	0.0556787	0.814039
	SIL-IS	2.01202	0.295576	0.23139	3.24019	0.392486	3.01258	0.111919	0.0838781	0.876158
	* N = C + U + G + A

## Sheet: Fig 1E-I
								I/N (%)
								Biological replica
	Biological replicas	poly(A) RNA			Inosine	average	st.dev. P	1	2	3
	1	293T (4)			poly(A) RNA	0.0325358	0.0026988	0.0362664	0.0313682	0.0299727
	2	293T (5)			total RNA	0.0051411	0.000787442	0.00403863	0.00555625	0.00582841
	3	293T (6)
	Biological replicas	total RNA
	1	293T (4)
	2	293T (5)						m6A/N (%)
	3	293T (6)						Biological replica
					m6A	average	st.dev. P	1	2	3
					poly(A) RNA	0.032301	0.000303713	0.0318724	0.0324906	0.0325399
					total RNA	0.0839188	0.00294147	0.0798284	0.0866197	0.0853084
								m62A/N (%)
								Biological replica
					m62A	average	st.dev. P	1	2	3
					poly(A) RNA	0.0194359	0.00222623	0.0176957	0.0180339	0.0225782
					total RNA	0.000323149	7.83655e-05	0.000430083	0.000244473	0.000294889
								m5U/N (%)
								Biological replica
					m5U	average	st.dev. P	1	2	3
					poly(A) RNA	0.0194359	0.00222623	0.0176957	0.0180339	0.0225782
					total RNA	0.000323149	7.83655e-05	0.000430083	0.000244473	0.000294889
								m7G/N (%)
								Biological replica
					m7G	average	st.dev. P	1	2	3
					poly(A) RNA	0.245582	0.0203366	0.274297	0.229837	0.23261
					total RNA	0.0070204	0.00104737	0.00554412	0.00765406	0.00786303
								Biological replica							m6Am/N (%)
					m6Am	average	st.dev. P	1	2	3
					poly(A) RNA	0.00167238	0.000384392	0.00143316	0.00136924	0.00221474
					total RNA	0.012792	0.000331487	0.0123299	0.0130913	0.0129549
								m227G/N (%)
								Biological replica
					m227G	average	st.dev. P	1	2	3
					poly(A) RNA	0.00167238	0.000384392	0.00143316	0.00136924	0.00221474
					total RNA	0.012792	0.000331487	0.0123299	0.0130913	0.0129549
								A/N (%)
								Biological replica
					A	average	st.dev. P	1	2	3
					poly(A) RNA	33.6545	0.0747167	33.6103	33.7597	33.5935
					total RNA	17.2236	0.141064	17.4227	17.1129	17.1352
