# Supplementary material
Source: HighWire-hosted journal article supplement (doi:10.1101/rna.080324.124)
Supplement: Supplemental_Source_data_Fig_2.xlsx [file Supplemental_Source_data_Fig_2.xlsx]

## Sheet: Fig 2C Raw data
	Experiment date 31.8.2021, biological replicas n=1, source poly (A) RNA
		Modified nucleosides (molar amouth)									Canonical nucleosides (molar amouth)
		Inosine	m6A	m62A	m5U	m5C	m7G	m6Am	m227G	Am	A	G	U	C	N*
	Sample name	(fmol)	(fmol)	(fmol)	(fmol)	(fmol)	(fmol)	(fmol)	(fmol)	(fmol)	(fmol)	(fmol)	(fmol)	(fmol)	(fmol)
	HEK293 shADAR1 (1a)*	31.8309	413.137	1.54961	9.15347	14.0342	764.893	56.9808	1.02068	46.0991	333775	215073	175890	181405	906144
	HEK293 shADAR1 (1a)*	28.3013	414.567	1.53556	8.90081	14.0111	766.339	56.9734	0.984799	46.3572	333428	214939	175628	180543	904539
	HEK293 shADAR1 (1b)*	31.2232	430.597	1.50692	8.27894	15.3258	859.456	63.123	1.02617	48.9126	352506	223836	182845	190119	949306
	HEK293 shADAR1 (1b)*	32.3382	429.416	1.51597	7.56955	15.2768	859.377	62.4951	1.09082	48.8565	353271	224972	183048	189369	950660
	HEK293 shADAR1 (1c)*	33.5721	418.194	1.43731	7.36157	14.2659	802.989	59.7461	1.00403	46.7129	352168	229117	185194	194108	960587
	HEK293 shADAR1 (1c)*	26.8717	421.277	1.43248	7.2491	14.5489	802.964	59.5866	0.963405	46.8218	352130	229272	185665	194411	961479
	HEK293 Scrambled (1a)*	72.9346	401.539	1.47492	5.5909	5.9856	625.5	29.0936	0.497764	34.6829	327157	199619	167006	169335	863117
	HEK293 Scrambled (1a)*	73.0476	400.297	1.46877	5.52975	5.86697	620.772	28.8788	0.495571	34.2212	327444	199860	166650	169159	863113
	HEK293 Scrambled (1b)*	75.6882	417.034	1.22525	5.14455	6.67836	654.864	29.9602	0.506483	32.4401	326200	195766	164980	164655	851601
	HEK293 Scrambled (1b)*	75.6901	417.511	1.22118	5.25494	6.35126	652.262	29.7385	0.463258	32.2703	326772	196147	164762	164096	851778
	HEK293 Scrambled (1c)*	80.8691	455.963	1.35643	5.871	6.48634	712.715	33.0984	0.534842	34.8199	339577	200252	169162	168744	877735
	HEK293 Scrambled (1c)*	82.7466	458.454	1.35925	5.85029	6.56661	711.374	32.6599	0.537663	34.8983	339722	200445	169017	169159	878343
	SIL-IS	1.96991	0.110305	0.0295346	2.31417	0.245707	0.929029	0.0703999	0.00588379	0.250844
	SIL-IS	2.19863	0.122356	0.0331928	2.50333	0.233188	0.931807	0.0756633	0.00615195	0.251501
	* N = C + U + G + A				a,b, c …technical replicas
	Experiment date 1.6.2021, biological replicas n=2, source poly (A) RNA
		Modified nucleosides (molar amouth)									Canonical nucleosides (molar amouth)
		Inosine	m6A	m62A	m5U	m5C	m7G	m6Am	m227G	Am	A	G	U	C	N*
	Sample name	(fmol)	(fmol)	(fmol)	(fmol)	(fmol)	(fmol)	(fmol)	(fmol)	(fmol)	(fmol)	(fmol)	(fmol)	(fmol)	(fmol)
	HEK293 shADAR1 (2a)*	21.5762	489.736	2.86573	11.7551	26.0839	891.037	70.1085	1.17874	206.754	333042	220621	188785	188435	930882
	HEK293 shADAR1 (2a)*	21.9957	486.402	2.85721	11.4225	26.1159	887.065	70.2169	1.2055	207.794	333073	220414	188335	188682	930504
	HEK293 shADAR1 (2b)*	20.4562	466.75	2.59161	11.9726	27.0265	887.505	68.6535	1.19499	195.533	331216	217368	185780	185266	919629
	HEK293 shADAR1 (2b)*	20.9625	468.032	2.6451	11.6146	27.1812	889.054	69.1128	1.24044	196.223	331238	217291	185730	185838	920096
	HEK293 shADAR1 (3a)*	13.7597	370.043	1.16596	11.7181	16.4504	615.474	45.514	0.926316	133.471	298238	175696	156033	151655	781622
	HEK293 shADAR1 (3a)*	15.3629	371.959	1.1718	12.0835	16.2752	616.288	45.2447	0.888036	133.527	298572	175883	155616	151361	781431
	HEK293 shADAR1 (4a)*	16.8069	215.122	1.0496	8.73548	15.3987	618.245	21.0633	0.914296	143.3	321715	181236	162611	156879	822441
	HEK293 shADAR1 (4a)*	17.6373	217.579	1.0298	8.02638	14.9021	620.361	21.0552	0.891564	142.67	321859	181433	162303	157514	823109
	HEK293 shADAR1 (4b)*	22.7796	211.415	1.1968	11.9161	14.0938	584.116	20.2697	0.743649	146.232	306536	183687	162102	157762	810087
	HEK293 shADAR1 (4b)*	20.8447	211.401	1.18838	11.7296	14.2148	582.368	20.5615	0.781028	145.865	306720	183904	163142	157871	811637
	HEK293 Scrambled (2a)*	41.2156	368.081	2.77459	12.7656	24.6993	757.862	43.7685	1.23084	192.825	318974	201329	173672	172675	866650
	HEK293 Scrambled (2a)*	42.1697	370.645	2.84688	12.2527	24.775	758.131	43.8357	1.3455	194.26	319528	201623	173743	172845	867740
	HEK293 Scrambled (2b)*	35.5616	343.612	1.69125	10.8976	19.9951	716.352	40.2211	1.09821	141.296	307027	186820	160015	159606	813467
	HEK293 Scrambled (2b)*	36.0311	347.686	1.7157	11.3065	19.7437	715.456	40.1958	1.09083	141.248	308125	187337	160309	159916	815687
	HEK293 Scrambled (3a)*	45.4691	418.598	2.50129	15.055	25.192	885.032	65.869	0.889712	199.096	332997	226176	190903	197087	947162
	HEK293 Scrambled (3a)*	46.2188	415.481	2.55384	14.7597	24.9293	884.429	66.1631	0.835139	198.302	333770	226747	191210	197257	948985
	HEK293 Scrambled (3b)*	55.5821	458.909	2.70696	17.09	23.3357	886.108	67.1858	0.798338	209.305	327015	226902	191840	195558	941315
	HEK293 Scrambled (3b)*	56.6632	461.469	2.71613	18.2434	23.4696	883.544	66.8236	0.76588	209.931	327510	227221	191776	195481	941987
	SIL-IS	1.66714	0.205843	0.073557	2.8483	0.516761	1.91057	0.0763074	0.00757149	1.74139
	SIL-IS	1.79918	0.211222	0.0831679	2.85899	0.534559	1.92033	0.0695775	0.00896162	1.87711
	* N = C + U + G + A				a,b …technical replicas

## Sheet: Fig 2C
								I/N (%)
								Biological replica
	Biological replicas	poly(A) RNA			Inosine	average	st.dev. P	1	2	3	4
	1	HEK293 Scrambled (1)			HEK293 Scrambled	0.00608495	0.00184139	0.00864572	0.0043948	0.00521432
	2	HEK293 Scrambled (2)			HEK293 shADAR1	0.00224445	0.000508012	0.0030482	0.00210877	0.00164142	0.00217939
	3	HEK293 Scrambled (3)
	Biological replicas	poly(A) RNA
	1	HEK293 shADAR1 (1)
	2	HEK293 shADAR1 (2)						m6A/N (%)
	3	HEK293 shADAR1 (3)						Biological replica
	4	HEK293 shADAR1 (4)			m6A	average	st.dev. P	1	2	3	4
					HEK293 Scrambled	0.0460178	0.00273698	0.0491583	0.0424881	0.0464072
					HEK293 shADAR1	0.0425195	0.0097469	0.0448717	0.0516036	0.0474447	0.0261581
								m6Am/N (%)
								Biological replica
					m6Am	average	st.dev. P	1	2	3	4
					HEK293 Scrambled	0.00518134	0.00143734	0.00352743	0.00498488	0.0070317
					HEK293 shADAR1	0.005549	0.00184862	0.00636342	0.0075057	0.00579717	0.00252972

## Sheet: Fig 2D Raw data
	Experiment date 06.10.2020, biological replicas n=4, source poly (A) RNA
		Modified nucleosides (molar amouth)										Canonical nucleosides (molar amouth)
		Inosine	m6A	m62A	m5U	m5C	m7G	m6Am	m227G	Am	m1A	A	G	U	C	N*
	Sample name	(fmol)	(fmol)	(fmol)	(fmol)	(fmol)	(fmol)	(fmol)	(fmol)	(fmol)	(fmol)	(fmol)	(fmol)	(fmol)	(fmol)	(fmol)
	293T METTL3 KD (1)	22.8111	419.09	1.632	9.35749	35.1057	582.56	86.7706	0.704601	27.2931	18.9859	193428	132400	110581	114022	550431
	293T METTL3 KD (1)	22.85	421.045	1.5777	9.55583	35.4279	582.825	86.8719	0.694013	27.3349	18.4175	193659	132793	110135	114006	550592
	293T METTL3 KD (2)	24.3273	435.152	1.58438	12.4241	40.1646	628.331	95.1217	0.665698	28.7804	20.8935	216102	148168	123884	128210	616364
	293T METTL3 KD (2)	23.4369	438.474	1.57177	11.4296	39.9182	633.017	96.3562	0.712486	28.5654	20.9025	216859	148808	123687	128466	617820
	293T METTL3 KD (3)	26.3684	468.963	2.43838	13.7492	40.7756	666.59	101.125	0.697695	35.9276	31.7255	228152	155486	129648	134292	647579
	293T METTL3 KD (3)	26.8138	472.821	2.4393	14.1463	40.9153	669.127	100.766	0.696517	35.5635	31.5642	229092	156067	130232	135205	650596
	293T METTL3 KD (4)	24.3631	410.054	1.89809	13.901	39.3153	639.048	93.0762	0.802027	29.8749	28.5644	220957	149620	125292	129027	624896
	293T METTL3 KD (4)	25.8424	408.766	1.89197	14.8313	38.832	633.165	93.445	0.772792	30.0265	28.4346	220882	149754	124833	128915	624384
	293T Scrambled (1)	24.7509	511.22	1.86202	10.2671	47.0143	582.042	90.7681	0.607776	29.3861	19.9173	208938	143327	119335	123119	594720
	293T Scrambled (1)	25.3906	511.508	1.84127	11.0023	46.687	583.13	90.3852	0.588808	29.4322	19.6547	209009	143656	119678	123247	595590
	293T Scrambled (2)	22.2469	499.274	1.53059	12.2545	42.3971	596.743	91.0263	0.651973	26.355	19.9577	205492	138793	115471	119564	579319
	293T Scrambled (2)	22.7745	499.123	1.53212	11.6313	42.3471	596.312	91.708	0.611819	26.3457	19.6193	204698	138389	115529	118779	577395
	293T Scrambled (3)	27.9842	570.16	2.13358	12.1833	45.5661	677.317	103.073	0.718934	32.1631	21.7945	226399	156470	130093	134821	647783
	293T Scrambled (3)	28.9477	572.376	2.14003	12.6175	46.4419	675.314	102.615	0.761872	32.4855	21.8557	226141	156540	129903	134677	647261
	293T Scrambled (4)	24.727	509.666	1.92164	13.1841	43.5416	623.713	94.1112	0.67956	30.3841	23.3376	210701	144425	120292	124528	599945
	293T Scrambled (4)	25.0376	512.982	1.88496	13.4756	43.7367	624.749	93.7794	0.700847	30.2901	23.0716	211006	144742	120920	124608	601276
	SIL-IS	1.06738	0.0907787	0.0480057	1.7227	0.238302	0.129025	0.0744978	0.00433962	0.370763	0.277429
	SIL-IS	1.10438	0.0909637	0.041278	1.7689	0.23955	0.126166	0.0820054	0.00439238	0.405014	0.280732
	* N = C + U + G + A

## Sheet: Fig 2D
								I/N (%)
								Biological replica
	Biological replicas	poly(A) RNA			Inosine	average	st.dev. P	1	2	3	4
	1	293T Scrambled (1)			293T Scrambled	0.00398124	0.000187378	0.00402998	0.00370452	0.00422846	0.00396201
	2	293T Scrambled (2)			293T METTL3 KD	0.00385461	0.000100601	0.0039499	0.00369422	0.00392934	0.00384496
	3	293T Scrambled (3)
	4	293T Scrambled (4)
	Biological replicas	poly(A) RNA
	1	293T METTL3 KD (1)						m6A/N (%)
	2	293T METTL3 KD (2)						Biological replica
	3	293T METTL3 KD (3)			m6A	average	st.dev. P	1	2	3	4
	4	293T METTL3 KD (4)			293T Scrambled	0.086383	0.00113693	0.085906	0.0862977	0.0882097	0.0851186
					293T METTL3 KD	0.0712801	0.00387259	0.0762884	0.0707708	0.0725325	0.0655288
								m6Am/N (%)
								Biological replica
					m6Am	average	st.dev. P	1	2	3	4
					293T Scrambled	0.0156224	0.000255613	0.0152059	0.0157843	0.0158706	0.0156286
					293T METTL3 KD	0.0154291	0.000310805	0.0157568	0.0155018	0.01554	0.0149178
