# Supplementary material
Source: HighWire-hosted journal article supplement (doi:10.1101/rna.080324.124)
Supplement: Supplemental_Source_data_Fig_3.xlsx [file Supplemental_Source_data_Fig_3.xlsx]

## Sheet: Fig 3B Raw data
	Experiment date 02.2.2019, biological replicas n=3 (n=1 -SVP samples), source total RNA
		Modified nucleosides (molar amouth)									Canonical nucleosides (molar amouth)
		Inosine	m6A	m62A	m5U	m5C	m7G	m6Am	A	G	U	C	N*
	Sample name	(fmol)	(fmol)	(fmol)	(fmol)	(fmol)	(fmol)	(fmol)	(fmol)	(fmol)	(fmol)	(fmol)	(fmol)
	293T (1A)	434.749	625.011	699.316	1141.42	2956.63	1908.45	42.1395	275506	564461	245964	460461	1.54639e+06
	293T (1A)	498.326	626.239	701.275	1135.69	2949.78	1798.85	42.7041	275538	563797	245865	460612	1.54581e+06
	293T (2A)	744.712	999.957	1086.05	1802	4372.78	2887.83	62.6199	419276	859994	373344	701378	2.35399e+06
	293T (2A)	740.715	994.592	1128.34	1822.46	4389.47	2887.07	63.2197	416621	855856	371654	699026	2.34316e+06
	293T (3A)	754.381	944.902	1084.01	1717.61	4185.65	2771.05	63.0923	406342	832675	361691	680226	2.28093e+06
	293T (3A)	655.164	963.098	1071.11	1775.85	4165.46	2766.98	64.2414	408196	837380	363488	682944	2.29201e+06
	FTO KO (1A)	440.377	667.445	710.45	1149.06	2835.23	1843.59	101.377	282442	576640	250344	469817	1.57924e+06
	FTO KO (1A)	472.782	658.908	719.403	1120.59	2859.23	1843.3	102.444	282488	575906	250513	470231	1.57914e+06
	FTO KO (2A)	712.732	1086.52	1005.09	1631.49	4115.34	2747.87	140.658	406723	832675	361691	680226	2.28131e+06
	FTO KO (2A)	651.738	958.752	1159.68	1647.78	4096.6	2730.11	139.238	408196	835211	363789	681416	2.28861e+06
	FTO KO (3A)	650.16	939.303	958.363	1560.38	3837.3	2513.35	141.342	396980	809082	357102	657677	2.22084e+06
	FTO KO (3A)	638.356	957.162	1079.91	1548.98	3844.42	2501.82	140.693	396622	808679	356968	658689	2.22096e+06
	ALKBH5 KO (1A)	510.622	654.968	717.746	1236.66	3118.77	1993.84	41.2498	286474	587488	257450	475921	1.60733e+06
	ALKBH5 KO (1A)	541.41	661.142	735.193	1215.66	3147.84	2002.74	41.3972	287071	587314	257810	476128	1.60832e+06
	ALKBH5 KO (2A)	776.546	1023.31	1117.06	1859.51	4489.09	3085.9	63.9219	448824	925281	402754	755359	2.53222e+06
	ALKBH5 KO (2A)	723.974	1029.35	1165.45	1871.37	4593.4	3057.59	63.0255	449060	927982	403546	757783	2.53837e+06
	ALKBH5 KO (3A)	677.977	958.64	1049.84	1753.54	4379.74	2810.18	58.5688	415438	847927	368764	691820	2.32395e+06
	ALKBH5 KO (3A)	707.637	943.443	1036.1	1763.33	4379.67	2795.71	58.0894	415139	848314	368946	692035	2.32443e+06
	293T (-SVP)	442.046	627.863	706.207	1151.8	2886.16	1781.58	32.37	277457	568549	247896	463297	1.5572e+06
	293T (-SVP)	432.591	617.034	721.514	1140.69	2897.8	1796.1	32.1818	277848	568100	247748	463750	1.55745e+06
	FTO KO (-SVP)	487.023	645.059	665.777	1087.87	2821.36	1796.41	35.5556	276139	563907	245223	456890	1.54216e+06
	FTO KO (-SVP)	429.644	659.431	705.621	1114	2781.61	1782.19	35.5247	275793	563672	244391	458426	1.54228e+06
	ALKBH5 KO (-SVP)	450.497	590.458	635.953	1111.18	2797.33	1792.31	29.1302	255899	525891	227298	427861	1.43695e+06
	ALKBH5 KO (-SVP)	472.472	584.874	670.949	1095.31	2773.33	1785.31	28.3067	256095	526686	227143	428465	1.43839e+06
	* N = C + U + G + A
	Experiment date 16.04.2019, biological replicas n=2 (FTO KO n= 1), source total RNA
		Modified nucleosides (molar amouth)									Canonical nucleosides (molar amouth)
		Inosine	m6A	m62A	m5U	m5C	m7G	m6Am	A	G	U	C	N*
	Sample name	(fmol)	(fmol)	(fmol)	(fmol)	(fmol)	(fmol)	(fmol)	(fmol)	(fmol)	(fmol)	(fmol)	(fmol)
	293T (1B)	559.7	745.397	521.055	1440.2	5025.84	2347.35	58.7365	580236	844367	378976	666118	2.46789e+06
	293T (1B)	581.044	749.332	502.919	1420.64	5112	2364.64	57.2327	578743	841968	377589	664649	2.46115e+06
	293T (1B) (-SVP)	626.774	751.462	518.948	1387.4	4619.14	2282.93	42.0433	590406	858642	384475	676249	2.50791e+06
	293T (1B) (-SVP)	597.907	758.83	511.037	1476.66	4606.64	2301.44	41.3922	588419	856253	384338	676798	2.50396e+06
	293T (2B)	670.435	817.442	572.633	1711.47	5141.99	2751.33	62.3434	632576	956988	412401	730359	2.73006e+06
	293T (2B)	677.503	809.797	559.04	1649.56	5238.68	2765.21	62.2928	632546	927658	412658	730690	2.70141e+06
	293T (2B) (-SVP)	677.064	813.329	551.296	1592.65	4734.39	2609.91	45.5574	637404	934172	415677	736855	2.72194e+06
	293T (2B) (-SVP)	706.111	818.502	543.054	1598.46	5058.36	2643.73	45.6578	639497	936330	417050	736152	2.72685e+06
	FTO KO (1B)	653.744	834.604	563.388	1551.76	5750.67	2687.15	84.1354	651533	944726	424840	748191	2.76708e+06
	FTO KO (1B)	689.175	837.711	544.911	1611.25	5231.83	2707.41	85.6195	650572	944731	424643	745626	2.76336e+06
	FTO KO (1B) (-SVP)	632.692	785.956	519.321	1502.55	4237.92	2440.79	43.3861	611850	892344	398974	704227	2.6054e+06
	FTO KO (1B) (-SVP)	616.102	787.806	544.694	1503.57	4421.95	2471.3	43.9626	611566	891399	398845	703948	2.60377e+06
	* N = C + U + G + A
	Experiment date 20.05.2019, biological replicas n=2, source total RNA
		Modified nucleosides (molar amouth)									Canonical nucleosides (molar amouth)
		Inosine	m6A	m62A	m5U	m5C	m7G	m6Am	A	G	U	C	N*
	Sample name	(fmol)	(fmol)	(fmol)	(fmol)	(fmol)	(fmol)	(fmol)	(fmol)	(fmol)	(fmol)	(fmol)	(fmol)
	293T (1C)	298.286	317.458	238.587	645.095	2532.64	1048.79	25.434	162543	333101	149054	292066	934145
	293T (1C)	304.457	313.723	239.547	638.911	2483.33	1049.7	25.5468	162618	333080	148688	285344	927214
	293T (1C) (-SVP)	289.713	309.94	227.128	607.632	2382.64	999.907	18.2774	155267	319196	142356	273351	887837
	293T (1C) (-SVP)	280.93	309.579	229.254	614.172	2410.82	999.892	18.55	155281	318771	142565	271631	885941
	FTO KO (1C)	272.732	325.069	236.263	588.004	2290.75	991.99	58.0833	154586	316144	141557	270994	880983
	FTO KO (1C)	276.836	318.075	231.769	588.159	2273.58	991.118	58.1792	154915	317020	141968	270563	882174
	FTO KO (1C) (-SVP)	275.977	320.595	235.751	576.164	2211.66	960.18	18.2384	150065	307681	137770	262711	856053
	FTO KO (1C) (-SVP)	267.061	319.819	229.801	574.476	2165.46	958.328	18.4782	150338	308016	137137	261198	854535
	* N = C + U + G + A

## Sheet:  Fig 3B
	Biological replicas	total RNA						m6Am/N (%)
	1	293T (1A)						Biological replica
	2	293T (2A)			m6Am	average	st.dev. P	1	2	3	4	5	6	7	8	9
	3	293T (3A)			293T	0.00259896	0.00019773	0.00274379	0.00267906	0.0027845	0.00235277	0.00229471	0.00273891
	4	293T (2A)			293T (-SVP)	0.00187189	0.000202515	0.00207252	0.00166476	0.00167405	0.00207621
	5	293T (2B)			FTO KO	0.00571821	0.0013332	0.00645333	0.00612472	0.00634955	0.00306947	0.00659399
	6	293T (1C)			FTO KO (-SVP)	0.00204258	0.000266555	0.00230448	0.00167683	0.00214644
	Biological replicas	total RNA			ALKBH5 KO	0.0025278	3.00437e-05	0.00257014	0.0025036	0.00250965
	1	FTO KO (1A)			ALKBH5 KO (-SVP)	0.00199757	0	0.00199757
	2	FTO KO (2A)
	3	FTO KO (3A)
	4	FTO KO (1B)
	5	FTO KO (1C)
	Biological replicas	total RNA
	1	ALKBH5 KO (1A)
	2	ALKBH5 KO (2A)
	3	ALKBH5 KO (3A)
	Biological replicas	total RNA
	1	293T (-SVP)
	2	293T (1B) (-SVP)
	3	293T (2B) (-SVP)
	4	293T (3A) (-SVP)
	Biological replicas	total RNA
	1	FTO KO (-SVP)
	2	FTO KO (1B) (-SVP)
	3	FTO KO (3A) (-SVP)
	Biological replicas	total RNA
	1	ALKBH5 KO (-SVP)

## Sheet: Fig 3C Raw data
	Experiment date 02.2.2019, biological replicas n=3 (n=1 FTO mutants), source total RNA
		Modified nucleosides (molar amouth)									Canonical nucleosides (molar amouth)
		Inosine	m6A	m62A	m5U	m5C	m7G	m6Am	A	G	U	C	N*
	Sample name	(fmol)	(fmol)	(fmol)	(fmol)	(fmol)	(fmol)	(fmol)	(fmol)	(fmol)	(fmol)	(fmol)	(fmol)
	293T (1A)	434.749	625.011	699.316	1141.42	2956.63	1908.45	42.1395	275506	564461	245964	460461	1.54639e+06
	293T (1A)	498.326	626.239	701.275	1135.69	2949.78	1798.85	42.7041	275538	563797	245865	460612	1.54581e+06
	293T (2A)	744.712	999.957	1086.05	1802	4372.78	2887.83	62.6199	419276	859994	373344	701378	2.35399e+06
	293T (2A)	740.715	994.592	1128.34	1822.46	4389.47	2887.07	63.2197	416621	855856	371654	699026	2.34316e+06
	293T (3A)	754.381	944.902	1084.01	1717.61	4185.65	2771.05	63.0923	406342	832675	361691	680226	2.28093e+06
	293T (3A)	655.164	963.098	1071.11	1775.85	4165.46	2766.98	64.2414	408196	837380	363488	682944	2.29201e+06
	FTO KO (1A)	440.377	667.445	710.45	1149.06	2835.23	1843.59	101.377	282442	576640	250344	469817	1.57924e+06
	FTO KO (1A)	472.782	658.908	719.403	1120.59	2859.23	1843.3	102.444	282488	575906	250513	470231	1.57914e+06
	FTO KO (2A)	712.732	1086.52	1005.09	1631.49	4115.34	2747.87	140.658	406723	832675	361691	680226	2.28131e+06
	FTO KO (2A)	651.738	958.752	1159.68	1647.78	4096.6	2730.11	139.238	408196	835211	363789	681416	2.28861e+06
	FTO KO (3A)	650.16	939.303	958.363	1560.38	3837.3	2513.35	141.342	396980	809082	357102	657677	2.22084e+06
	FTO KO (3A)	638.356	957.162	1079.91	1548.98	3844.42	2501.82	140.693	396622	808679	356968	658689	2.22096e+06
	FTO KO (1) +WT	644.71	896.718	1029.52	1662.95	3991.62	2593.47	60.8647	395633	803227	352371	656814	2.20804e+06
	FTO KO (1) +WT	647.193	921.548	1004.02	1662.6	3937.28	2599	60.2305	395910	803902	352708	657029	2.20955e+06
	FTO KO(1) +RQ	594.063	930.303	984.431	1566.67	3952.16	2487.17	75.8076	387347	789800	344290	644958	2.1664e+06
	FTO KO(1) +RQ	665.622	963.06	950.429	1578.84	3993.65	2515.58	76.0455	387479	790034	344423	645146	2.16708e+06
	FTO KO(1) +HD	645.138	992.888	1025.41	1597.46	4065.5	2621.37	141.097	410843	837341	366771	683872	2.29883e+06
	FTO KO(1) +HD	660.596	980.128	1123.71	1555.08	4048.93	2591.5	141.992	411183	841217	368623	685850	2.30687e+06
	* N = C + U + G + A
	Experiment date 20.05.2019, biological replicas n=2, source total RNA
		Modified nucleosides (molar amouth)									Canonical nucleosides (molar amouth)
		Inosine	m6A	m62A	m5U	m5C	m7G	m6Am	A	G	U	C	N*
	Sample name	(fmol)	(fmol)	(fmol)	(fmol)	(fmol)	(fmol)	(fmol)	(fmol)	(fmol)	(fmol)	(fmol)	(fmol)
	292T (1C)	298.286	317.458	238.587	645.095	2532.64	1048.79	25.434	162543	333101	149054	292066	934145
	292T (1C)	304.457	313.723	239.547	638.911	2483.33	1049.7	25.5468	162618	333080	148688	285344	927214
	FTO KO (3) +WT	257.379	308.052	243.763	571.297	2235.7	928.251	25.631	156835	329498	142752	281187	907821
	FTO KO (3) +WT	251.008	307.466	241.503	561.237	2305.95	929.795	25.869	156891	329943	142471	283067	909893
	FTO KO (2) +WT	231.329	304.399	235.03	521.071	2162.25	855.515	23.5561	144966	301840	132642	259526	836845
	FTO KO (2) +WT	227.701	302.131	230.81	526.912	2126.5	855	23.9254	145098	302403	132159	257774	835330
	FTO KO(3) +RQ	290.735	303.134	225.641	602.902	2384.04	997.946	36.0875	152150	312736	139275	267553	869467
	FTO KO(3) +RQ	289.081	303.356	226.733	587.751	2482.3	998.213	35.7646	152352	312789	139592	267458	869945
	FTO KO (2) +RQ	229.608	260.469	201.582	502.654	2060.42	841.065	28.9483	115954	244548	108008	207761	674847
	FTO KO (2) +RQ	230.864	260.599	200.808	501.099	2038.13	838.75	29.023	116311	244851	107863	208191	675787
	FTO KO(3) +HD	262.371	304.406	235.418	564.552	2294.51	964.895	63.2271	143703	300348	131943	256404	830314
	FTO KO(3) +HD	260.785	306.654	235.147	570.011	2358.34	965.812	63.2953	143717	300513	197314	255703	895174
	FTO KO(2) +HD	271.809	304.663	229.582	582.115	2289.49	1003.09	56.8583	151098	313155	137814	268190	868001
	FTO KO(2) +HD	268.077	302.847	228.134	576.603	2354.31	1001.57	56.6092	151347	313044	138145	268334	868611
	FTO KO (1C)	272.732	325.069	236.263	588.004	2290.75	991.99	58.0833	154586	316144	141557	270994	880983
	FTO KO (1C)	276.836	318.075	231.769	588.159	2273.58	991.118	58.1792	154915	317020	141968	270563	882174
	* N = C + U + G + A

## Sheet: Fig 3C 
	Biological replicas	total RNA						m6Am/N (%)
	1	293T (1A)						Biological replica
	2	293T (2A)			m6Am	average	st.dev. P	1	2	3	4	5	6	7	8	9
	3	293T (3A)			293T	0.00273657	3.76239e-05	0.00274379	0.00267906	0.0027845	0.00273891
	4	293T (1B)			FTO KO	0.0063804	0.000171218	0.00645333	0.00612472	0.00634955	0.00659399
					FTO KO + WT	0.00280465	4.49333e-05	0.0027412	0.00283323	0.0028395
					FTO KO + RQ	0.00397572	0.00033987	0.00350419	0.00413083	0.00429216
	Biological replicas	total RNA			FTO KO + HD	0.00667097	0.000493815	0.00614651	0.00733256	0.00653384
	1	FTO KO (1A)
	2	FTO KO (2A)
	3	FTO KO (3A)
	4	FTO KO (1B)
	Biological replicas	total RNA
	1	FTO KO (1) +WT
	2	FTO KO (2) +WT
	3	FTO KO (3) +WT
	Biological replicas	total RNA
	1	FTO KO(1) +RQ
	2	FTO KO(2) +RQ
	3	FTO KO(3) +RQ
	Biological replicas	total RNA
	1	FTO KO(1) +HD
	2	FTO KO(2) +HD
	3	FTO KO(3) +HD

## Sheet: Fig 3D Raw data
	Experiment date 19.7.2022, biological replicas n=3, source poly (A) RNA
		Modified nucleosides (molar amouth)									Canonical nucleosides (molar amouth)
		Inosine	m6A	m62A	m5U	m5C	m7G	m6Am	m227G	Am	A	G	U	C	N*
	Sample name	(fmol)	(fmol)	(fmol)	(fmol)	(fmol)	(fmol)	(fmol)	(fmol)	(fmol)	(fmol)	(fmol)	(fmol)	(fmol)	(fmol)
	FTO KO (1)	49.7077	704.651	1.59352	6.04861	44.2112	637.234	103.858	0.784502	58.1553	239001	177833	154928	157160	728921
	FTO KO (1)	49.9041	714.734	1.60329	6.25492	42.3008	638.975	105.294	0.788565	57.7963	239019	177714	155246	157353	729333
	FTO KO (2)	15.3532	171.424	0.435941	2.75502	6.12767	28.696	17.9462	0.0231737	12.2391	63558.5	50254.5	28140.5	33986.7	175940
	FTO KO (2)	15.888	179.262	0.46671	2.76272	6.14075	30.9322	18.4757	0.025998	12.4729	67056.9	52618.7	28737	34890.7	183303
	FTO KO (3)	9.53171	65.6884	0.220217	2.56113	3.43584	35.5356	6.68732	0.0517165	5.90348	20230.9	17069.8	14449.1	14977.9	66727.7
	FTO KO (3)	9.93656	64.6057	0.219035	2.42342	3.35303	35.3893	6.80857	0.045105	5.78959	20423.4	16974	14103.7	15126.8	66627.9
	FTO KO (1)	47.2853	721.586	1.89435	5.97969	32.9243	595.707	110.983	0.464755	53.5666	227474	169219	147575	149869	694136
	FTO KO (1)	47.2371	716.563	1.70468	5.86478	32.8706	594.067	108.266	0.403714	53.669	227632	168790	148126	150142	694691
	FTO KO (2)	48.7798	693.601	1.70065	6.57058	35.7288	605.128	112.184	0.438597	55.8101	235048	175446	151484	155116	717094
	FTO KO (2)	48.8111	682.417	1.79971	6.5253	33.9377	605.54	110.947	0.586901	53.711	235519	174951	152013	155438	717921
	FTO KO (3)	52.7344	747.665	2.60896	7.81103	40.1376	638.925	111.753	0.612937	64.6378	252656	184842	162425	164895	764818
	FTO KO (3)	55.0187	749.475	2.54386	7.97951	40.1074	639.327	111.011	0.680057	65.6875	252877	184940	163352	165265	766434
	293T (1)	30.3212	380.353	1.4929	5.36356	24.6806	417.017	55.4268	0.335922	33.9607	167384	111609	98535.1	100257	477784
	293T (1)	30.1524	379.283	1.4431	4.93394	25.1309	419.842	54.7924	0.308687	34.2561	167397	111812	99207.9	100435	478852
	293T (2)	55.8344	679.03	1.63006	7.5055	42.831	742.584	104.669	0.601375	54.6412	247803	180998	157362	159621	745784
	293T (2)	54.0378	694.946	1.74647	7.44237	42.7438	743.74	104.648	0.72267	54.9834	247767	183054	157239	159878	747938
	293T (3)	50.9805	638.627	2.52642	7.65422	38.6198	607.439	95.9253	0.488846	66.7006	230192	167970	145855	148902	692920
	293T (3)	52.5616	641.957	2.7019	7.32576	39.163	605.173	94.4802	0.471032	69.1605	231375	168625	147277	149724	697001
	SIL-IS only	4.08984	0.132894	0.0729254	2.48655	0.343971	0.999594	0.146993	0.00748634	0.735677	30.8469	-32.1429	22.7397	99.8365	121.28
	SIL-IS only	3.84546	0.124691	0.0554011	2.06352	0.28466	0.95483	0.0816736	0.0049723	0.850306	-30.8475	32.1424	-22.7401	-99.8412	-121.286
	* N = C + U + G + A
	Experiment date 12.8.2022, biological replicas n=3, source poly (A) RNA
		Modified nucleosides (molar amouth)									Canonical nucleosides (molar amouth)
		Inosine	m6A	m62A	m5U	m5C	m7G	m6Am	m227G	Am	A	G	U	C	N*
	Sample name	(fmol)	(fmol)	(fmol)	(fmol)	(fmol)	(fmol)	(fmol)	(fmol)	(fmol)	(fmol)	(fmol)	(fmol)	(fmol)	(fmol)
	FTO KO CTR(1)	40.9119	674.559	2.10257	56.2441	17.8718	406.83	87.5787	0.253691	73.7064	204158	153683	135862	136946	630649
	FTO KO CTR (1)	39.6446	683.194	2.30724	56.5088	18.7037	407.739	87.5047	0.27071	73.3401	204289	153750	136386	136882	631307
	FTO KO CTR(2)	42.7233	720.288	2.21318	56.5732	24.8421	527.219	102.529	0.400264	70.9955	232509	171202	150483	152030	706224
	FTO KO CTR(2)	43.8412	719.268	2.01223	58.5813	24.3266	527.457	104.753	0.379218	70.1868	233085	172012	150585	153060	708742
	FTO KO CTR(3)	41.969	712.768	2.30477	57.4987	19.6842	407.718	89.4216	0.298557	77.1079	202468	151138	134350	134252	622209
	FTO KO CTR(3)	41.9579	723.445	2.18022	55.3975	18.7141	405.201	88.1069	0.288208	78.176	203131	151842	135826	134994	625793
	293T CTR (1)	52.5037	724.973	1.68372	57.381	28.3439	482.683	96.2556	0.396113	71.6092	221342	164965	145144	146039	677490
	293T CTR (1)	51.3693	722.555	1.53725	57.7207	27.5818	483.647	93.7369	0.359636	71.3232	221533	165151	144897	146570	678151
	293T CTR (2)	56.3881	678.262	1.92331	58.0607	31.2843	572.958	96.8036	0.418741	72.4752	241755	178047	155297	158001	733101
	293T CTR (2)	56.3214	689.704	1.86698	60.6651	30.762	571.763	96.4784	0.523834	73.7346	242665	178651	155884	157196	734396
	293T CTR (3)	53.9977	721.361	2.18171	58.5974	31.8128	589.706	100.812	0.507464	80.7364	242240	178197	155500	156923	732860
	293T CTR (3)	54.8547	719.232	2.12991	60.06	31.7089	591.512	101.109	0.460528	78.9059	242018	178522	155674	156553	732766
	SIL-IS only	1.76686	0.183559	0.0501712	54.8945	0.202758	1.38177	0.126203	0.00840784	1.02302	-9.49385	5.36108	-163.013	-24.9699	-192.115
	SIL-IS only	1.99495	0.14541	0.0291887	53.5587	0.211979	1.45289	0.086542	0.0118099	0.807255	9.49379	-5.36109	162.991	24.9696	192.093
	* N = C + U + G + A
	Experiment date 08.2.2022, biological replicas n=3, source poly (A) RNA
		Modified nucleosides (molar amouth)									Canonical nucleosides (molar amouth)
		Inosine	m6A	m62A	m5U	m5C	m7G	m6Am	m227G	Am	A	G	U	C	N*
	Sample name	(fmol)	(fmol)	(fmol)	(fmol)	(fmol)	(fmol)	(fmol)	(fmol)	(fmol)	(fmol)	(fmol)	(fmol)	(fmol)	(fmol)
	FTO KO (4)	35.3707	574.779	2.26199	7.92451	30.0511	581.291	95.8638	0.447567	36.0948	206943	153694	132698	134327	627662
	FTO KO (4)	33.6755	568.743	2.11707	8.59065	31.0491	586.044	95.0639	0.412835	34.8429	207043	153741	132574	134601	627959
	FTO KO (5)	38.9597	525.4	1.44423	9.75132	40.5215	533.607	82.5157	0.371924	25.1492	198348	148149	125442	129938	601877
	FTO KO (5)	38.1735	531.199	1.57153	10.1867	40.8782	533.801	82.4359	0.37597	25.2746	198671	148692	125660	130325	603349
	FTO KO (6)	42.5818	595.495	1.97723	12.4105	48.2639	616.598	88.4226	0.629345	31.0289	229347	167184	144724	148653	689908
	FTO KO (6)	41.6387	606.481	1.90901	11.9416	49.5631	614.22	91.5498	0.603069	30.8956	231590	168469	144855	148524	693438
	293T (4)	29.6331	523.142	2.85522	10.4684	36.0219	623.503	80.7854	0.434137	35.2978	219845	157949	135410	140067	653270
	293T (4)	29.8986	522.764	2.87077	10.722	36.9679	623.874	80.8319	0.449806	34.6531	220303	159070	135868	141050	656291
	293T (5)	39.9128	573.159	1.73398	13.3125	50.6227	705.044	87.777	0.393337	27.7699	227004	163301	139589	143273	673168
	293T (5)	40.9226	583.966	1.62422	13.2807	51.9672	709.754	87.1793	0.375757	27.7233	223786	160238	137627	140470	662120
	293T (6)	41.6247	556.711	1.99677	13.281	52.1225	678.504	86.1732	0.373398	29.3302	219568	158279	135497	140647	653992
	293T (6)	41.4536	562.545	1.96426	13.4001	51.3811	685.777	83.8694	0.343204	29.5101	220983	160000	135912	140534	657429
	SIL-IS	3.46472	0.259414	0.0386031	3.4581	0.1742	3.01604	0.0731388	0.00731055	0.406525	-40.3793	-56.2515	34.1853	174.55	112.105
	SIL-IS	3.17865	0.243897	0.0551845	3.23316	0.2119	3.0124	0.0764504	0.00089144	0.377397	40.3782	56.25	-34.1863	-174.564	-112.122
	* N = C + U + G + A

## Sheet: Fig 3D
								I/N (%)
								Biological replica
					Inosine	average	st.dev. P	1	2	3	4	5	6	7	8	9
					293T	0.00577938	0.000794492	0.00689883	0.00683421	0.00549812	0.00607637	0.00575911	0.00552448	0.00403863	0.00555625	0.00582841
					FTO KO	0.00602815	0.000436872	0.00623705	0.00625131	0.00652559	0.00608537	0.00585192	0.00642348	0.00505894	-	0.00579152
								m6A/N (%)
								Biological replica
	Biological replicas	poly(A) RNA			m6A	average	st.dev. P	1	2	3	4	5	6	7	8	9
	1	293T (1)			293T	0.089497	0.00731568	0.0923863	0.0920989	0.0794688	0.1026	0.0981443	0.0890184	0.0798284	0.0866197	0.0853084
	2	293T (2)			FTO KO	0.10223	0.00614146	0.103574	0.095926	0.0978587	0.107565	0.101715	0.115055	0.10066	-	0.0954907
	3	293T (3)
	4	293T CTR (1)
	5	293T CTR (2)
	6	293T CTR (3)						m6Am/N (%)
	7	293T (4)						Biological replica
	8	293T (5)			m6Am	average	st.dev. P	1	2	3	4	5	6	7	8	9
	9	293T (6)			293T	0.0133496	0.000946615	0.0137229	0.014018	0.0115105	0.0148463	0.0140814	0.0135912	0.0123299	0.0130913	0.0129549
	Biological replicas	poly(A) RNA			FTO KO	0.0148444	0.000611757	0.0157765	0.0155421	0.0145483	0.0138571	0.0146342	0.014208	0.0151242	-	0.0150648
	1	FTO KO (1)
	2	FTO KO (2)
	3	FTO KO (3)
	4	FTO KO CTR (1)						Relative ration of m7G/N
	5	FTO KO CTR (2)						Biological replica
	6	FTO KO CTR (3)			m7G	average	st.dev. P	1	2	3	4	5	6	7	8	9
	7	FTO KO (4)			293T	1	0.0451136	0.955619	1.08862	0.955765	1.00959	0.990414	0.999994	0.935854	1.04161	1.02254
	8	degraded RNA			FTO KO	0.93656	0.0672542	0.935949	0.92192	0.912725	0.841614	0.97263	0.849295	1.0166	-	1.04175
	9	FTO KO (6)
