# Supplementary material
Source: HighWire-hosted journal article supplement (doi:10.1101/rna.080324.124)
Supplement: Supplemental_Source_data_Fig_S1.xlsx [file Supplemental_Source_data_Fig_S1.xlsx]

## Sheet: Supplemental Fig. S1A Raw data
	Experiment date 02.11.2018, biological replicas n=3, source total RNA
	Modified nucleosides (molar amouth)							Canonical nucleosides (molar amouth)
		Inosine	m6A	m62A	ψ	m7G	m6Am	A	G	U	C	N*	I/N (%)	m6A/N (%)	m62A/N (%)	ψ/N (%)	m7G/N (%)	m6Am/N (%)
	Sample name	(fmol)	(fmol)	(fmol)	(fmol)	(fmol)	(fmol)	(fmol)	(fmol)	(fmol)	(fmol)	(fmol)
	NP1 (120' 37°C)	476.124	653.843	435.195	20826.1	2236.87	29.7891	301147	410397	257359	560138	1.52904e+06	0.0303741	0.0422475	0.0285075	1.36787	0.144641	0.00198802
	NP1 (120' 37°C)	456.211	642.947	439.846	21160.9	2202.9	31.2335	301171	411512	257373	559349	1.52941e+06
	NP1 + SVP (30' 37°C)	427.75	618.498	408.128	20012.9	2202.82	40.5335	298088	404510	254119	553331	1.51005e+06	0.0280097	0.041275	0.0271493	1.33214	0.143342	0.00265327
	NP1 + SVP (30' 37°C)	418.419	628.416	412.048	20230.9	2127.52	39.6216	295884	402344	252665	549331	1.50022e+06
	NP1 + SVP (60' 37°C)	465.624	627.618	415.996	20393.7	2256.14	41.6214	300312	406689	256259	557169	1.52043e+06	0.0296225	0.0413196	0.0276133	1.3945	0.14871	0.00272765
	NP1 + SVP (60' 37°C)	438.198	633.098	426.523	22154.5	2281.2	41.6029	300119	407167	256216	556323	1.51982e+06
	NP1 + SVP (120' 37°C)	472.411	643.888	434.119	20539.4	2301.2	40.7326	299383	406639	254820	554073	1.51491e+06	0.0303445	0.0430604	0.0285833	1.39626	0.150311	0.0027348
	NP1 + SVP (120' 37°C)	447.681	661.767	432.569	21797.4	2256.45	42.1908	296947	404604	253591	551279	1.50642e+06
	NP1 + SVP (160' 37°C)	408.927	622.409	402.764	19337.9	2125.31	40.7002	293003	399038	249924	543927	1.48589e+06	0.0286059	0.0419243	0.0270424	1.31645	0.144211	0.00271947
	NP1 + SVP (160' 37°C)	443.957	627.565	403.506	19912.2	2174.35	40.3808	292800	398640	250206	543452	1.4851e+06
	SIL-IS	0	1.33879	0	1.53409	0	2.12503	21970.4	21283.6	19566.6	34694.3	97515	0.00416949	0.00139544	0	0.00125537	0.00272377	0.00245404
	SIL-IS	8.00751	1.34116	0	0.876847	5.231	2.58795	21398.1	20724.2	19063.1	33608	94793.4
	NP1 + SVP (180' 37°C)	588.36	684.962	627.743	27371	2971.8	47.593	329279	452090	274604	613087	1.66906e+06	0.0348132	0.0406534	0.035947	1.62767	0.177065	0.00279371
	NP1 + SVP (180' 37°C)	580.533	680.02	579.217	27279.9	2973.34	46.2089	329600	451692	281053	613215	1.67556e+06

## Sheet: Supplemental Fig. S1A 
				I/N (%)	m6A/N (%)	m62A/N (%)	ψ/N (%)	m7G/N (%)	m6Am/N (%)
			Sample name
			NP1 (120' 37°C)	1	1	1	1	1	1
			NP1 + SVP (30' 37°C)	0.922157	0.976982	0.952355	0.973875	0.991018	1.33463
			NP1 + SVP (60' 37°C)	0.975256	0.978038	0.968633	1.01947	1.02813	1.37204
			NP1 + SVP (120' 37°C)	0.999027	1.01924	1.00266	1.02075	1.0392	1.37564
			NP1 + SVP (160' 37°C)	0.941786	0.992351	0.948607	0.962409	0.997029	1.36792
			NP1 + SVP (180' 37°C)	1.14615	0.962267	1.26097	1.18993	1.22417	1.40527
