# Supplementary material
Source: HighWire-hosted journal article supplement (doi:10.1101/rna.080324.124)
Supplement: Supplemental_Source_data_Fig_S4.xlsx [file Supplemental_Source_data_Fig_S4.xlsx]

## Sheet: Supplemental Fig 4A Raw data
	Experiment date 06.10.2020, biological replicas n=3, source poly (A) RNA
	Modified nucleosides (molar amouth)											Canonical nucleosides (molar amouth)
		Inosine	m6A	m62A	m5U	m5C	m7G	m6Am	m227G	Am	m1A	A	G	U	C	N*
	Sample name	(fmol)	(fmol)	(fmol)	(fmol)	(fmol)	(fmol)	(fmol)	(fmol)	(fmol)	(fmol)	(fmol)	(fmol)	(fmol)	(fmol)	(fmol)
	293T (1)	17.5686	409.681	2.09551	4.80081	4.80081	451.719	84.0058	0.369408	37.4143	2.75535	168814	122658	101106	105160	497738
	293T (1)	16.7071	412.013	2.02441	5.17233	5.17233	451.543	83.7044	0.363846	37.2304	2.7543	168969	122739	101194	103926	496827
	293T ALKBH5 KO 1 (1)	20.8031	466.36	2.16176	4.37038	4.37038	461.257	83.8524	0.444312	45.9868	2.35956	178188	126275	105373	106250	516086
	293T ALKBH5 KO 1 (1)	19.7561	464.996	2.16924	4.41521	4.41521	461.622	83.7843	0.490511	46.2884	2.32526	178715	126803	105900	106875	518292
	293T (2)	25.5734	565.532	2.78462	4.68236	4.68236	588.318	106.72	0.409443	48.9363	2.43795	219115	161142	133171	136677	650104
	293T (2)	25.9764	571.455	2.71265	4.46234	4.46234	591.692	106.539	0.47841	49.2216	2.38656	219415	161287	133593	137045	651340
	293T ALKBH5 KO (2)	23.7802	453.988	1.95595	4.36684	4.36684	480.827	79.2863	0.45471	40.5126	1.8537	178362	126609	104890	106378	516239
	293T ALKBH5 KO (2)	22.7218	457.57	1.97083	4.22214	4.22214	480.755	79.1985	0.428867	40.9722	1.87202	178465	126776	105314	106122	516677
	293T (3)	19.6055	386.922	1.19993	4.16062	4.16062	401.735	72.4884	0.293507	27.3526	1.64219	159067	112739	94029.5	94754.6	460590
	293T (3)	20.7658	383.752	1.25563	3.83079	3.83079	402.35	72.7123	0.300724	27.2917	1.71287	159669	113240	94645.1	94963.1	462517
	293T ALKBH5 KO (3)	23.1782	502.006	1.15337	4.13888	4.13888	473.04	84.002	0.487502	36.507	1.22906	188534	131216	110493	109744	539987
	293T ALKBH5 KO (3)	21.9152	504.552	1.20445	3.84427	3.84427	473.12	84.0035	0.489311	36.558	1.26867	188566	131286	110252	109567	539672
	293T (4)	22.6532	484.423	1.53002	3.44492	3.44492	456.363	89.5196	0.355581	33.1052	1.3151	187311	133590	112306	110256	543463
	293T (4)	23.1352	484.584	1.51634	3.44682	3.44682	454.891	89.3657	0.327555	33.555	1.35908	187852	133816	112211	111218	545096
	SIL-IS	1.06738	0.0823777	0.0480057	1.7227	1.7227	0.129025	0.0744978	0.00433962	0.370763	0.277429
	Sil-IS	1.10438	0.0825455	0.041278	1.7689	1.7689	0.126166	0.0820054	0.00439238	0.405014	0.280732
	* N = C + U + G + A

## Sheet: Supplemental  Fig 4A 
	Biological replicas	poly (A)RNA						m62A/N (%)
	1	293T (1)						Biological replica
	2	293T (2)			m62A	average	st.dev. P	1	2	3	4	5	6	7	8	9
	3	293T (3)			293T	0.000208524	4.54503e-05	0.000250615	0.000256974	0.000158514	0.000167992
	4	293T (4)			293T ALKBH5 KO	0.000204427	5.35631e-05	0.000253592	0.00022975	0.000129938
	Biological replicas	poly (A)RNA
	1	293T ALKBH5 KO (1)
	2	293T ALKBH5 KO (2)
	3	293T ALKBH5 KO (3)						m5U/N (%)
								Biological replica
					m5U	average	st.dev. P	1	2	3	4	5	6	7	8	9
					293T	0.0004104	0.000106109	0.000567272	0.000378095	0.00042436	0.000271875
					293T ALKBH5 KO	0.000412372	3.61395e-05	0.000445472	0.000429546	0.000362097
								Relative ration of m7G/N (%)
								Biological replica
					m7G	average	st.dev. P	1	2	3	4	5	6	7	8	9
					293T	0.0824372	0.00273956	0.0850037	0.0848682	0.0815254	0.0783515
					293T ALKBH5 KO	0.0842218	0.00214623	0.0835077	0.0871336	0.082024

## Sheet: Supplemental Fig 4C Raw data
	Experiment date 12.8.2022, biological replicas n=3, source poly (A) RNA
		Modified nucleosides (molar amouth)									Canonical nucleosides (molar amouth)
		Inosine	m6A	m62A	m5U	m5C	m7G	m6Am	m227G	Am	A	G	U	C	N*
	Sample name	(fmol)	(fmol)	(fmol)	(fmol)	(fmol)	(fmol)	(fmol)	(fmol)	(fmol)	(fmol)	(fmol)	(fmol)	(fmol)	(fmol)
	293T ALKBH5 KD (1)	53.1884	783.411	1.87215	59.0951	34.4757	609.478	103.825	0.63638	73.4548	251790	184692	160361	162665	759508
	293T ALKBH5 KD (1)	53.6819	791.041	1.70298	60.2088	34.4998	608.449	106.576	0.49335	73.6404	251777	185274	160890	163260	761201
	293T ALKBH5 KD (2)	57.2296	815.18	2.1182	58.3697	35.0011	559.237	106.204	0.418303	77.715	238211	176222	154116	156054	724602
	293T ALKBH5 KD (2)	59.4994	808.197	2.15616	57.9973	34.3408	557.637	107.83	0.405923	77.2871	238473	176939	154913	157309	727634
	293T ALKBH5 KD (3)	60.369	812.801	1.74352	58.519	35.6	601.721	112.112	0.451004	72.438	253319	186247	162121	164772	766459
	293T ALKBH5 KD (3)	60.7295	828.036	1.78951	58.9671	35.8775	597.863	108.99	0.566038	72.4146	253454	186989	161745	166942	769130
	293T scrambled (1)	52.5037	724.973	1.68372	57.381	28.3439	482.683	96.2556	0.396113	71.6092	221342	164965	145144	146039	677490
	293T scrambled (1)	51.3693	722.555	1.53725	57.7207	27.5818	483.647	93.7369	0.359636	71.3232	221533	165151	144897	146570	678151
	293T scrambled (2)	56.3881	678.262	1.92331	58.0607	31.2843	572.958	96.8036	0.418741	72.4752	241755	178047	155297	158001	733101
	293T scrambled (2)	56.3214	689.704	1.86698	60.6651	30.762	571.763	96.4784	0.523834	73.7346	242665	178651	155884	157196	734396
	293T scrambled (3)	53.9977	721.361	2.18171	58.5974	31.8128	589.706	100.812	0.507464	80.7364	242240	178197	155500	156923	732860
	293T scrambled (3)	54.8547	719.232	2.12991	60.06	31.7089	591.512	101.109	0.460528	78.9059	242018	178522	155674	156553	732766
	SIL-IS only	1.76686	0.183559	0.0501712	54.8945	0.202758	1.38177	0.126203	0.00840784	1.02302
	SIL-IS only	1.99495	0.14541	0.0291887	53.5587	0.211979	1.45289	0.086542	0.0118099	0.807255
	* N = C + U + G + A
	Experiment date 09.3.2022, biological replicas n=3, source poly (A) RNA
		Modified nucleosides (molar amouth)									Canonical nucleosides (molar amouth)
		Inosine	m6A	m62A	m5U	m5C	m7G	m6Am	m227G	Am	A	G	U	C	N*
	Sample name	(fmol)	(fmol)	(fmol)	(fmol)	(fmol)	(fmol)	(fmol)	(fmol)	(fmol)	(fmol)	(fmol)	(fmol)	(fmol)	(fmol)
	293T ALKBH5 KD (4)	36.704	577.553	1.33093	6.91138	36.9305	631.38	81.708	0.561045	31.8339	192426	143424	121004	125364	582219
	293T ALKBH5 KD (4)	37.5866	576.887	1.34991	7.33914	36.7587	630.2	81.555	0.610943	32.0855	192285	143730	121303	125429	582748
	293T ALKBH5 KD (5)	37.1586	603.729	1.27913	8.50233	41.7262	702.847	87.1632	0.942884	30.7494	203565	146122	124672	127338	601696
	293T ALKBH5 KD (5)	36.998	613.083	1.33508	8.28089	42.2077	705.947	86.8626	1.01368	30.4187	204060	146744	124839	128502	604147
	293T ALKBH5 KD (6)	44.5323	588.536	1.45153	9.74694	43.0493	645.141	74.5772	0.698644	29.5478	221672	145593	126778	127483	621526
	293T ALKBH5 KD (6)	44.046	580.29	1.35631	9.44841	42.8519	648.786	74.5983	0.676842	28.3879	222416	146210	126989	127564	623180
	293T scrambled (4)	41.9644	641.307	1.65526	8.33519	38.11	717.513	92.3529	0.904686	38.728	210658	151292	130063	132044	624056
	293T scrambled (4)	43.3151	641.824	1.53437	8.46299	38.3179	719.752	93.4193	0.875127	38.5559	211130	151670	130500	132787	626088
	293T scrambled (5)	41.6345	625.876	1.66871	8.38973	40.2583	720.18	89.6975	0.829239	36.5333	213388	154017	133732	136052	637189
	293T scrambled (5)	41.1613	626.819	1.66677	9.03126	40.2968	718.81	90.1371	0.840223	36.5795	214909	154789	132946	136052	638696
	293T scrambled (6)	37.2174	537.194	1.67104	10.7099	41.8379	686.804	82.003	0.595642	33.1403	202665	146801	123804	128341	601611
	293T scrambled (6)	38.7158	536.723	1.81554	11.089	42.0851	686.595	82.059	0.625156	33.4083	203424	147082	124278	129457	604240
	SIL-IS	4.62919	0.265969	0.0659088	2.82957	0.362554	2.59723	0.0887002	0.0204414	0.668963
	SIL-IS	4.68692	0.221103	0.0820967	2.70111	0.362301	2.65453	0.0834127	0.0135627	0.707405
	* N = C + U + G + A
	Experiment date 31.10.2021, biological replicas n=3, source poly (A) RNA
		Modified nucleosides (molar amouth)									Canonical nucleosides (molar amouth)
		Inosine	m6A	m62A	m5U	m5C	m7G	m6Am	m227G	Am	A	G	U	C	N*
	Sample name	(fmol)	(fmol)	(fmol)	(fmol)	(fmol)	(fmol)	(fmol)	(fmol)	(fmol)	(fmol)	(fmol)	(fmol)	(fmol)	(fmol)
	293T ALKBH5 KD (7)	36.0418	444.485	2.84012	6.88962	46.0986	530.834	63.3554	0.902439	39.7955	146317	109595	91303.6	93693.7	440910
	293T ALKBH5 KD (7)	35.9599	443.364	2.75031	7.29049	46.6178	527.5	61.7498	0.790806	39.8782	146894	109914	93259.6	94192.1	444260
	293T ALKBH5 KD (8)	51.682	648.896	3.98784	7.9512	54.9072	697.209	79.6206	1.02193	60.3114	201043	151502	128755	131526	612827
	293T ALKBH5 KD (8)	51.4508	630.11	4.16996	7.42903	53.6944	697.081	82.0455	1.04656	61.1129	201423	152349	129738	130719	614230
	293T ALKBH5 KD (9)	42.0902	478.1	3.17464	6.51161	40.3834	527.851	64.2314	0.769565	47.4954	146331	107356	92505.8	93242	439434
	293T ALKBH5 KD (9)	43.2426	484.493	3.09655	6.87574	40.7715	528.281	63.8885	0.878139	48.2043	147062	107883	93942.3	92572.3	441460
	293T scrambled (7)	30.1605	398.49	2.40362	5.92099	35.1856	437.647	57.1454	0.480868	37.6356	125341	98351.3	80871.1	85046.8	389610
	293T scrambled (7)	31.5113	392.079	2.15073	5.70022	34.9363	434.183	55.4169	0.4879	37.3083	124910	98290.5	80949.5	84828.6	388979
	293T scrambled (8)	53.4155	533.6	3.75721	7.00066	41.5861	643.848	76.206	0.749814	57.5664	177724	136299	116355	117684	548062
	293T scrambled (8)	52.5081	544.131	4.10511	6.62674	39.9372	639.426	75.0037	0.747183	58.6757	177591	136304	115646	118508	548049
	293T scrambled (9)	38.0171	442.029	3.50892	7.37754	39.3774	579.565	62.9987	0.638254	53.6593	165169	123190	104371	105897	498627
	293T scrambled (9)	33.8985	440.412	3.77369	7.03524	38.8083	578.638	63.5125	0.875595	54.0524	164934	123175	103079	106177	497366
	HeLa ALKBH5 KD (1)	38.7045	383.012	1.95896	6.60766	28.1485	475.041	68.6888	0.334416	37.2848	132729	104578	87909.1	92260.8	417478
	HeLa ALKBH5 KD (1)	40.5248	380.064	1.91824	6.22428	28.4815	473.097	69.3854	0.277118	37.0384	132601	104710	88606.7	91186	417104
	HeLa ALKBH5 KD (2)	44.0765	472.317	3.18857	5.85029	29.9805	526.752	88.6256	1.36634	57.1314	168817	130419	111316	114777	525329
	HeLa ALKBH5 KD (2)	41.9813	473.981	3.4191	6.14382	30.876	526.507	91.184	0.993973	57.9645	170091	130899	111656	115042	527688
	HeLa ALKBH5 KD (3)	41.7523	458.451	3.65535	6.44289	26.6845	454.616	81.7183	1.15517	61.1715	156343	122770	104875	108713	492701
	HeLa ALKBH5 KD (3)	41.229	452.045	3.66796	6.14164	27.2735	455.992	82.764	1.13476	63.4949	155080	122613	105400	106846	489940
	HeLa scrambled (1)	35.2966	323.28	2.03045	5.97412	23.7549	388.245	57.7567	0.209473	36.8818	112061	92926.3	77826.3	81742	364555
	HeLa scrambled (1)	36.1125	327.777	1.99268	5.27831	23.5597	385.207	57.4113	0.291306	35.6114	111985	92682.6	76920.4	82100.6	363689
	HeLa scrambled (2)	43.2042	446.555	3.27058	6.40638	32.0607	510.854	82.4875	0.749782	56.878	159563	125329	107813	110424	503128
	HeLa scrambled (2)	45.1199	441.931	3.09183	6.0154	31.7934	509.017	81.6083	0.943705	56.0284	159678	125546	107465	110330	503020
	HeLa scrambled (3)	50.6125	492.275	3.11986	7.33943	36.0665	617.7	99.6162	1.40834	64.6836	181187	140500	120215	123574	565475
	HeLa scrambled (3)	47.5101	492.689	3.29045	6.41076	37.3772	618.736	100.695	1.09735	63.0626	181098	140368	119188	124118	564772
	SIL-IS	4.08556	0.40272	0.0913212	3.54987	0.239461	3.79137	0.0853416	0.0204312	0.413724
	SIL-IS	4.56107	0.402564	0.0591923	3.36888	0.268963	3.73736	0.0797822	0.0203273	0.421276
	* N = C + U + G + A
	Experiment date 14.11.2021, biological replicas n=3, source poly (A) RNA
		Modified nucleosides (molar amouth)									Canonical nucleosides (molar amouth)
		Inosine	m6A	m62A	m5U	m5C	m7G	m6Am	m227G	Am	A	G	U	C	N*
	Sample name	(fmol)	(fmol)	(fmol)	(fmol)	(fmol)	(fmol)	(fmol)	(fmol)	(fmol)	(fmol)	(fmol)	(fmol)	(fmol)	(fmol)
	SIL-IS	2.10695	0.240894	0.0703091	3.21215	0.157665	2.72338	0.00437786	0.0171627	0.2778
	SIL-IS	2.76388	0.569283	0.0774266	2.93189	0.155512	2.79399	0.00108286	0.0218488	0.272753
	U2OS ALKBH5 KD (1)	36.0102	596.889	2.03124	9.08872	12.4428	359.661	71.8109	0.280402	33.4569	181518	135373	118011	121290	556191
	U2OS ALKBH5 KD (1)	36.1669	594.121	2.12853	8.74434	12.8262	360.249	73.5667	0.251949	33.1632	182818	135671	118854	120622	557963
	U2OS ALKBH5 KD (2)	33.1788	556.589	2.09996	8.7103	12.6324	322.953	66.7849	0.191522	32.3215	165783	125059	110106	112184	513131
	U2OS ALKBH5 KD (2)	33.4571	562.707	2.16651	7.76188	12.8008	323.216	66.116	0.221896	32.9115	166048	124958	110113	112075	513194
	U2OS ALKBH5 KD (3)	27.7885	481.456	3.08133	6.37386	9.49363	267.615	59.9508	0.18169	42.701	141604	112138	98016.3	101282	453040
	U2OS ALKBH5 KD (3)	28.0823	469.867	2.92685	6.39315	9.72677	267.51	59.1727	0.12622	42.8511	141812	112558	97945.3	100162	452477
	U2OS scrambled (1)	35.3187	598.659	2.09434	10.8078	17.388	409.958	81.1333	0.167016	38.0077	196485	145816	128248	131616	602165
	U2OS scrambled (1)	32.6863	600.122	2.15845	10.9882	16.6616	410.381	80.4937	0.158387	37.5254	197492	146699	128000	132035	604226
	U2OS scrambled (2)	32.2052	504.486	3.22106	5.34719	9.89362	219.999	50.985	0.0943116	46.5747	129612	108898	94748.5	97999.2	431258
	U2OS scrambled (2)	32.6098	502.751	3.07246	5.5217	9.53707	220.547	51.4869	0.102014	45.6846	129980	108857	95587	98108.2	432533
	U2OS scrambled (3)	28.2818	470.375	2.56834	5.17479	8.61801	239.175	55.3711	0.0625365	38.3367	136135	111910	97973.7	100567	446585
	U2OS scrambled (3)	29.1735	470.173	2.5084	5.13658	8.58294	239.098	55.3297	0.0771701	39.7854	136849	112249	97576	100131	446805
	U87 ALKBH5 KD (1)	22.3118	279.197	2.00235	5.18894	9.23016	265.077	68.849	0.0838873	27.6929	118208	94936.9	81715.1	85932.4	380792
	U87 ALKBH5 KD (1)	22.7838	278.195	2.02817	5.30357	9.07045	265.283	67.2985	0.106596	27.7579	118652	95423.8	81601.1	86913.8	382591
	U87 ALKBH5 KD (2)	16.6891	302.896	2.18313	4.46839	6.00503	229.47	63.3998	0.0531666	30.6449	114021	91451.6	80219	82925.3	368617
	U87 ALKBH5 KD (2)	17.3737	301.554	2.11103	3.95397	6.11891	229.891	63.3102	0.0636924	30.8697	114612	91309.5	80447	84031.6	370401
	U87 ALKBH5 KD (3)	19.328	314.428	2.73646	4.21558	7.14506	231.154	63.1067	0.0926086	37.2045	120171	100499	88250	91274.5	400195
	U87 ALKBH5 KD (3)	19.3163	313.579	2.81855	4.25623	7.09927	231.294	63.2752	0.0526327	37.0489	120909	100357	88079.2	91523.6	400869
	U87 scrambled (1)	16.3542	303.588	1.70942	5.8178	10.0976	314.523	80.7238	0.0683081	28.023	132550	99642.4	86250.5	90293.5	408736
	U87 scrambled (1)	17.0972	294.862	1.73157	5.66184	10.1267	314.549	81.2712	0.104484	28.3329	133433	100332	86044.1	90215.6	410025
	U87 scrambled (2)	21.6953	394.897	3.10966	4.35546	8.76847	330.335	92.8361	0.143756	41.9936	163583	130818	114081	118633	527115
	U87 scrambled (2)	21.1482	394.421	3.19438	4.52889	9.0083	330.14	93.7418	0.119286	40.8503	163999	131081	114017	118524	527621
	U87 scrambled (3)	17.8811	418.032	2.88796	5.05476	8.78485	334.699	89.1833	0.114271	44.2533	158642	125034	109432	113738	506846
	U87 scrambled (3)	16.9467	411.645	2.75589	4.97681	9.14871	335.91	89.7352	0.0722824	44.9901	159076	125474	110730	113412	508690
	* N = C + U + G + A

## Sheet: Supplemental Fig 4C 
	Biological replicas	poly (A) RNA						m62A/N (%)
	1	293T scrambled (1)						Biological replica
	2	293T scrambled (2)			m62A	average	st.dev. P	1	2	3	4	5	6	7	8	9
	3	293T scrambled (3)			293T	0.000392071	0.000195367	0.000231744	0.000252875	0.000288768	0.000243302	0.000249825	0.000276864	0.000565617	0.000703561	0.000716079
	4	293T scrambled (4)			293T ALKBH5 KD	0.000371248	0.000202077	0.000229878	0.000288865	0.000224909	0.000614562	0.000652561	0.000694826	0.000217417	0.000204522	0.000213692
	5	293T scrambled (5)			HeLa	0.000567671	3.62957e-05	0.000531775	0.000617394	0.000553844
	6	293T scrambled (6)			HeLa ALKBH5 KD	0.000596563	0.000116302	0.000446533	0.000613205	0.000729951
	7	293T scrambled (7)			U87	0.000509036	7.74931e-05	0.000402224	0.000583682	0.000541203
	8	293T scrambled (8)			U87 ALKBH5 KD	0.00058157	6.94544e-05	0.000508629	0.000561072	0.000675011
	9	293T scrambled (9)			U2OS	0.00056632	0.000161979	0.000340275	0.00071149	0.000647194
	1	293T ALKBH5 KD (1)			U2OS ALKBH5 KD	0.000469533	0.000126747	0.000360097	0.000401309	0.000647194
	2	293T ALKBH5 KD (2)
	3	293T ALKBH5 KD (3)
	4	293T ALKBH5 KD (4)
	5	293T ALKBH5 KD (5)						m5U/N (%)
	6	293T ALKBH5 KD (7)						Biological replica
	7	293T ALKBH5 KD (8)			m5U	average	st.dev. P	1	2	3	4	5	6	7	8	9
	8	293T ALKBH5 KD (9)			293T	0.000781936	0.000240108	0.00049043	0.000700005	0.000696233	0.000901297	0.000931926	0.00134911	0.000603972	0.000612042	0.000752418
	9	293T ALKBH5 KD (10)			293T ALKBH5 KD	0.000763381	0.000160317	0.000713531	0.000544939	0.000588232	0.000820335	0.000689576	0.000734322	0.000748506	0.000933168	0.00109782
	Biological replicas	poly (A) RNA			HeLa	0.000582149	2.51863e-05	0.000595087	0.00054694	0.00060442
	1	HeLa scrambled (1)			HeLa ALKBH5 KD	0.000589031	9.29024e-05	0.000708523	0.000481982	0.000576588
	2	HeLa scrambled (2)			U87	0.000431428	0.000163628	0.000651668	0.000259809	0.000382806
	3	HeLa scrambled (3)			U87 ALKBH5 KD	0.000389502	0.000127575	0.000569631	0.000308291	0.000290585
	1	HeLa ALKBH5 KD (1)			U2OS	0.000858606	0.000319294	0.00129742	0.000546991	0.000731402
	2	HeLa ALKBH5 KD (2)			U2OS ALKBH5 KD	0.000928954	0.00014078	0.00104914	0.00100632	0.000731402
	3	HeLa ALKBH5 KD (3)
	Biological replicas	poly (A) RNA
	1	U87 scrambled (1)
	2	U87 scrambled (2)						m7G/N (%)
	3	U87 scrambled (3)						Biological replica
	1	U87 ALKBH5 KD (1)			m7G	average	st.dev. P	1	2	3	4	5	6	7	8	9
	2	U87 ALKBH5 KD (2)			293T	0.101399	0.0178649	0.071073	0.0778119	0.0804014	0.114548	0.112372	0.113459	0.111009	0.116388	0.11553
	3	U87 ALKBH5 KD (3)			293T ALKBH5 KD	0.101454	0.0171234	0.079903	0.076712	0.0779343	0.118712	0.113015	0.119039	0.107842	0.116395	0.103532
	Biological replicas	poly (A) RNA			HeLa	0.10484	0.0033207	0.105174	0.100616	0.108729
	1	U2OS scrambled (1)			HeLa ALKBH5 KD	0.101305	0.00860856	0.112704	0.099308	0.0919033
	2	U2OS scrambled (2)			U87	0.0679156	0.005991	0.0761583	0.0620968	0.0654916
	3	U2OS scrambled (3)			U87 ALKBH5 KD	0.0624015	0.00483227	0.0687522	0.0614118	0.0570404
	1	U2OS ALKBH5 KD (1)			U2OS	0.0587971	0.00701691	0.0675421	0.0503626	0.0584867
	2	U2OS ALKBH5 KD (2)			U2OS ALKBH5 KD	0.0616761	0.00235937	0.0641197	0.0624219	0.0584867
	3	U2OS ALKBH5 KD (3)

## Sheet: Supplemental Fig 4E Raw data
	Experiment date 08.02.2022, biological replicas n=3, source poly (A) RNA
	Modified nucleosides (molar amouth)										Canonical nucleosides (molar amouth)
		Inosine	m6A	m62A	m5U	m5C	m7G	m6Am	m227G	Am	A	G	U	C	N*
	Sample name	(fmol)	(fmol)	(fmol)	(fmol)	(fmol)	(fmol)	(fmol)	(fmol)	(fmol)	(fmol)	(fmol)	(fmol)	(fmol)	(fmol)
	293T ALKBH5 OE (1)	49.9538	444.06	3.52741	11.619	53.6112	720.032	98.0837	0.533415	49.2588	239633	171008	146612	152243	709496
	293T ALKBH5 OE (1)	49.8398	438.576	3.5754	11.5019	54.8478	723.487	100.686	0.635894	49.3174	240249	171803	146125	151856	710034
	293T ALKBH5 OE (2)	41.7593	400.056	2.74897	11.3567	54.519	660.29	84.3714	0.603683	39.5407	236926	171210	145937	152098	706170
	293T ALKBH5 OE (2)	42.9753	408.8	2.811	11.395	53.2299	665.493	84.4004	0.552145	40.3627	238212	172319	145661	152259	708450
	293T ALKBH5 OE (3)	50.5576	453.043	3.39676	12.4006	62.3607	713.942	87.5587	0.681342	44.2832	242748	173624	149319	154367	720057
	293T ALKBH5 OE (3)	50.6115	452.05	3.44683	12.2721	62.7914	715.954	89.1823	0.469648	43.3259	243956	174119	149906	154817	722799
	293T GFP (1)	39.2271	577.836	2.76936	10.8216	36.229	637.935	94.296	0.395805	41.9763	230987	167442	143425	147171	689026
	293T GFP (1)	38.9636	578.995	2.85086	10.3957	35.2528	638.535	94.543	0.396581	41.1335	232396	168743	144122	147880	693141
	293T GFP (2)	40.8353	607.71	2.65706	12.0086	39.1033	662.38	96.8752	0.371888	41.0646	235200	170477	146612	150730	703019
	293T GFP (2)	40.7985	608.685	2.61533	11.2597	39.4554	670.987	95.6707	0.375802	40.1966	234380	170554	146118	151035	702088
	293T GFP (3)	38.9632	593.363	2.31806	12.0825	43.129	662.071	93.6206	0.380958	36.1819	235409	168294	144543	148105	696351
	293T GFP (3)	38.2221	598.805	2.21247	12.3343	43.9481	666.742	93.5756	0.41489	36.8862	235676	168851	143817	147687	696031
	SIL-IS	3.46472	0.259414	0.0386031	3.4581	0.1742	3.01604	0.0731388	0.00731055	0.406525
	SIL-IS	3.17865	0.243897	0.0551845	3.23316	0.2119	3.0124	0.0764504	0.00089144	0.377397
	* N = C + U + G + A

## Sheet: Supplemental Fig 4E
	Biological replicas	poly (A)RNA						m62A/N (%)
	1	293T GFP (1)						Biological replica
	2	293T GFP (2)			m62A	average	st.dev. P	1	2	3	4	5	6	7	8	9
	3	293T GFP (3)			ALKBH5 OE	0.000449324	4.57332e-05	0.000493756	0.000386406	0.000467809
	Biological replicas	poly (A)RNA			GFP	0.000362346	3.34371e-05	0.000399839	0.000368555	0.000318644
	1	293T ABLKH5 OE (1)
	2	293T ABLKH5 OE (2)
	3	293T ABLKH5 OE (3)
								m5U/N (%)
								Biological replica
					m5U	average	st.dev. P	1	2	3	4	5	6	7	8	9
					ALKBH5 OE	0.00117965	4.79413e-05	0.0011574	0.00113531	0.00124624
					GFP	0.00116792	9.10441e-05	0.00105097	0.00117977	0.00127303
								Relative ration of m7G/N (%)
								Biological replica
					m7G	average	st.dev. P	1	2	3	4	5	6	7	8	9
					ALKBH5 OE	0.0977477	0.00332092	0.101265	0.0932939	0.0986839
					GFP	0.0937945	0.00134576	0.0919167	0.0944653	0.0950016
